# Supplementary material for: Untargeted Phenolic Profiling and Functional Insights of the Aerial Parts and Bulbs of Drimia maritima (L.) Stearn
Source: MDPI journal article supplement (doi:10.3390/plants11050600), 2022-02-23
Supplement: s1 [file s1]

**Table S4.** Discriminant phenolic compounds selected by using VIP (variable importance in projection) method following supervised OPLS-DA modelling as function of the different extraction solvents. The first block represents the discriminant compounds of aerial parts, while the second block represents those characteristics of bulbs part. Compounds are provided together with VIP scores  $\pm$  standard error (VIP  $\pm$ SE) and Log Foldchange values obtained by pair wise comparison among water and ethyl acetate extracts (H2O vs EA), methanol and ethyl acetate extracts (MeOH vs EA), and methanol and water extracts (MeOH vs H2O).

| AERIAL PARTS      |                                                                      |                 |                              |                               |                                 |
|-------------------|----------------------------------------------------------------------|-----------------|------------------------------|-------------------------------|---------------------------------|
| Clsss             | Primary ID                                                           | VIP $\pm$ SE    | Log FC A<br>[H2O] vs<br>[EA] | Log FC A<br>[MeOH] vs<br>[EA] | Log FC A<br>[MetOH]<br>vs [H2O] |
| Flavonoids        | Pelargonidin                                                         | 1.25 $\pm$ 0.23 | -1.51                        | 0.64                          | 2.15                            |
|                   | Cyanidin 3-O-(6''-succinyl-glucoside)                                | 1.24 $\pm$ 0.42 | -4.00                        | 0.73                          | 4.00                            |
|                   | Petunidin 3-O-(6''-acetyl-glucoside)                                 | 1.23 $\pm$ 0.43 | 1.28                         | 2.81                          | 1.54                            |
|                   | Pelargonidin 3,5-O-diglucoside                                       | 1.20 $\pm$ 0.35 | 2.61                         | -0.24                         | -2.85                           |
|                   | Cyanidin 3-O-(6''-acetyl-glucoside)                                  | 1.20 $\pm$ 0.38 | 4.00                         | 0.00                          | -4.00                           |
|                   | Naringenin                                                           | 1.22 $\pm$ 0.32 | 0.48                         | 1.98                          | 1.50                            |
|                   | 6-Geranylnaringenin                                                  | 1.23 $\pm$ 0.31 | -4.00                        | 0.34                          | 4.00                            |
|                   | Apigenin                                                             | 1.25 $\pm$ 0.23 | -1.49                        | 0.63                          | 2.12                            |
|                   | Chrysoeriol 7-O-(6''-malonyl-glucoside)                              | 1.24 $\pm$ 0.39 | 0.00                         | 4.00                          | 4.00                            |
|                   | Luteolin 7-O-(2-aposyl-6-malonyl)-glucoside                          | 1.22 $\pm$ 0.35 | 0.36                         | -4.00                         | -4.00                           |
|                   | Isorhamnetin 3-O-glucuronide                                         | 1.24 $\pm$ 0.34 | -4.00                        | 2.52                          | 4.00                            |
|                   | 6,8-Dihydroxykaempferol                                              | 1.20 $\pm$ 0.36 | 4.00                         | 0.00                          | -4.00                           |
|                   | Kaempferol 3-O-(2''-rhamnosyl-6''-acetyl-galactoside) 7-O-rhamnoside | 1.20 $\pm$ 0.34 | -4.00                        | 0.64                          | 4.00                            |
|                   | 6''-O-Acetylglycitin                                                 | 1.22 $\pm$ 0.37 | 1.16                         | -4.00                         | -4.00                           |
| Lignans           | Arctigenin                                                           | 1.24 $\pm$ 0.31 | 4.00                         | 4.00                          | 4.92                            |
|                   | Laricresinol-sesquilignan                                            | 1.23 $\pm$ 0.41 | 4.66                         | 5.95                          | 1.29                            |
|                   | Medioresinol                                                         | 1.2 $\pm$ 0.34  | 1.66                         | -0.20                         | -1.86                           |
| Other polyphenols | 5-Heneicosylresorcinol                                               | 1.24 $\pm$ 0.26 | -4.00                        | 1.15                          | 4.00                            |
|                   | Carnosol                                                             | 1.24 $\pm$ 0.38 | -4.00                        | 4.18                          | 4.00                            |
|                   | p-HPEA-AC                                                            | 1.24 $\pm$ 0.30 | 0.82                         | -4.00                         | -4.00                           |
|                   | Oleuropein-aglycone                                                  | 1.23 $\pm$ 0.38 | 2.22                         | 3.59                          | 1.37                            |

|                |                                   |             |       |       |       |
|----------------|-----------------------------------|-------------|-------|-------|-------|
| Phenolic acids | 3,4-DHPEA-EDA                     | 1.22 ± 0.35 | 1.53  | -2.55 | -4.09 |
|                | Protocatechuic acid 4-O-glucoside | 1.21 ± 0.35 | -2.61 | 0.06  | 2.67  |
|                | Rosmarinic acid                   | 1.24 ± 0.25 | -3.12 | 0.94  | 4.06  |
|                | Chicoric acid                     | 1.20 ± 0.42 | 2.57  | -0.68 | -3.25 |

#### BULBS

| Class             | Primary ID                                            | VIP ± SE    | Log FC R<br>[H2O] vs<br>[EA] | Log FC R<br>[MetOH]<br>vs [EA] | Log FC R<br>[MetOH]<br>vs [H2O] |
|-------------------|-------------------------------------------------------|-------------|------------------------------|--------------------------------|---------------------------------|
| Flavonoids        | Cyanidin 3-O-glucoside                                | 1.25 ± 0.29 | -1.03                        | 1.63                           | 2.66                            |
|                   | Pelargonidin                                          | 1.24 ± 0.36 | 1.89                         | -1.14                          | -3.03                           |
|                   | Cyanidin 3-O-glucosyl-rutinoside                      | 1.24 ± 0.34 | 0.33                         | -0.96                          | -1.29                           |
|                   | Vitisin A                                             | 1.23 ± 0.37 | 3.49                         | -4.00                          | -4.00                           |
|                   | Cyanidin 3-O-(6''-malonyl-glucoside)                  | 1.23 ± 0.37 | 4.00                         |                                | -4.00                           |
|                   | Petunidin 3,5-O-diglucoside                           | 1.23 ± 0.35 | 0.80                         | 2.82                           | 2.02                            |
|                   | Pelargonidin 3-O-glucoside                            | 1.22 ± 0.36 | -0.94                        | 0.98                           | 1.91                            |
|                   | (+)-Catechin 3-O-glucose                              | 1.23 ± 0.35 | 0.09                         | 5.86                           | 5.77                            |
|                   | Dihydroquercetin                                      | 1.23 ± 0.37 | -1.06                        | 0.75                           | 1.82                            |
|                   | Theaflavin                                            | 1.25 ± 0.28 | -2.19                        | 2.20                           | 4.39                            |
|                   | Narirutin 4'-O-glucoside                              | 1.23 ± 0.37 | 3.65                         | -0.36                          | -4.01                           |
|                   | Luteolin 6-C-glucoside                                | 1.25 ± 0.29 | -0.98                        | 1.60                           | 2.58                            |
|                   | Apigenin 6,8-di-C-glucoside                           | 1.23 ± 0.35 | 0.39                         | 1.66                           | 1.27                            |
|                   | Apigenin 6-C-glucoside                                | 1.22 ± 0.36 | -0.90                        | 0.97                           | 1.87                            |
|                   | Isorhoifolin                                          | 1.20 ± 0.46 | -0.48                        | 0.57                           | 1.05                            |
|                   | Jaceidin 4'-O-glucuronide                             | 1.24 ± 0.35 | 1.86                         | -4.00                          | -4.00                           |
|                   | Quercetin 3-O-(6'''-malonyl-glucoside)                | 1.24 ± 0.38 | 2.43                         | -4.00                          | -4.00                           |
|                   | Quercetin 3-O-(6''-acetyl-galactoside) 7-O-rhamnoside | 1.23 ± 0.37 | 4.00                         |                                | -4.00                           |
|                   | Quercetin 3-O-glucosyl-rhamnosyl-galactoside          | 1.21 ± 0.45 | 4.00                         |                                | -4.00                           |
|                   | Kaempferide                                           | 1.20 ± 0.50 | 3.47                         | 0.58                           | -2.89                           |
| Lignans           | Quercetin 7,4'-O-diglucoside                          | 1.20 ± 0.39 | 4.00                         | 4.00                           | 2.54                            |
|                   | Secoisolariciresinol-sesquiligann                     | 1.24 ± 0.32 | 0.53                         | -3.18                          | -3.71                           |
| Other polyphenols | Medioresinol                                          | 1.21 ± 0.41 | 3.01                         | 1.31                           | -1.70                           |
|                   | 5-Heptadecylresorcinol                                | 1.22 ± 0.37 | 5.26                         | 2.04                           | -3.21                           |
|                   | Psoralen                                              | 1.23 ± 0.37 | 3.26                         | -4.00                          | -4.00                           |
|                   | Esculin                                               | 1.22 ± 0.36 | 3.59                         | 1.29                           | -2.29                           |

|                |                           |             |       |       |       |
|----------------|---------------------------|-------------|-------|-------|-------|
| Phenolic acids | p-HPEA-AC                 | 1.22 ± 0.35 | 4.20  | 1.89  | -2.31 |
|                | 3,4-Dicaffeoylquinic acid | 1.23 ± 0.36 | 2.43  | -4.00 | -4.00 |
|                | p-Coumaroyl tartaric acid | 1.21 ± 0.41 | 0.41  | 2.30  | 1.89  |
| Stilbenes      | Resveratrol               | 1.22 ± 0.43 | -1.22 | 0.53  | 1.75  |
