# Supplementary material for: Untargeted Phenolic Profiling and Functional Insights of the Aerial Parts and Bulbs of Drimia maritima (L.) Stearn
Source: MDPI journal article supplement (doi:10.3390/plants11050600), 2022-02-23
Supplement: s1 [file s1]

**Table S1.** Total bioactive compounds of the tested extracts.

| Parts        | Solvents | TPC (mg GAE/g)            | TFC (mg RE/g)             |
|--------------|----------|---------------------------|---------------------------|
| Aerial parts | EA       | 19.99 ± 0.18 <sup>a</sup> | 22.32 ± 0.73 <sup>b</sup> |
|              | MeOH     | 21.58 ± 0.10 <sup>b</sup> | 34.67 ± 0.27 <sup>c</sup> |
|              | Water    | 31.56 ± 0.35 <sup>c</sup> | 10.15 ± 0.30 <sup>a</sup> |
| Bulbs        | EA       | 20.27 ± 0.15 <sup>B</sup> | 4.25 ± 0.09 <sup>C</sup>  |
|              | MeOH     | 10.72 ± 0.29 <sup>A</sup> | 3.12 ± 0.05 <sup>B</sup>  |
|              | Water    | 10.39 ± 0.02 <sup>A</sup> | 1.06 ± 0.16 <sup>A</sup>  |

\*Values are reported as mean ±SD. EA: Ethyl acetate; MeOH: Methanol; TPC: Total phenolic content; TFC: Total flavonoid content; GAE: Gallic acid equivalent; RE: Rutin equivalent; TE: Trolox equivalent.
