# Supplementary material for: Untargeted Phenolic Profiling and Functional Insights of the Aerial Parts and Bulbs of Drimia maritima (L.) Stearn
Source: MDPI journal article supplement (doi:10.3390/plants11050600), 2022-02-23
Supplement: s1 [file s1]

**Table S3.** Semi-quantification per classes of phenolics identified from UHPLC-ESI-QTOF-MS in the different aerial and bulb organ parts of *D. maritima*, considering three different extraction solvents *i.e.*, ethyl acetate (EA), methanol (MeOH), and water.

| Parts        | Solvents | Anthocyanins             | Flavanols                | Flavonols                  | Other<br>Flavonoids      | Lignans                   | Other<br>polyphenols      | Phenolic<br>acids        | Stilbenes                |
|--------------|----------|--------------------------|--------------------------|----------------------------|--------------------------|---------------------------|---------------------------|--------------------------|--------------------------|
| Aerial parts | EA       | 0.4 ± 0.04 <sup>a</sup>  | 0.33 ± 0.01 <sup>a</sup> | 0.34 ± 0.07 <sup>a</sup>   | 1.74 ± 0.09 <sup>a</sup> | 7.32 ± 0.28 <sup>c</sup>  | 11.96 ± 0.31 <sup>c</sup> | 1.94 ± 0.16 <sup>b</sup> | 0.54 ± 0.06 <sup>a</sup> |
|              | MeOH     | 2.24 ± 0.37 <sup>b</sup> | 0.54 ± 0.05 <sup>b</sup> | 2.35 ± 0.06 <sup>c</sup>   | 5.32 ± 0.26 <sup>b</sup> | 2.02 ± 0.04 <sup>a</sup>  | 10.18 ± 0.09 <sup>b</sup> | 1.04 ± 0.1 <sup>a</sup>  | 0.7 ± 0.05 <sup>b</sup>  |
|              | Water    | 2.02 ± 0.38 <sup>b</sup> | 2.85 ± 0.11 <sup>c</sup> | 1.66 ± 0.08 <sup>b</sup>   | 5.66 ± 0.39 <sup>b</sup> | 3.94 ± 0.1 <sup>b</sup>   | 7.14 ± 0.1 <sup>a</sup>   | 1.62 ± 0.21 <sup>b</sup> | 0.96 ± 0.06 <sup>c</sup> |
| Bulbs        | EA       | 0.3 ± 0.04               | 0.17 ± 0.03 <sup>A</sup> | 1.33 ± 0.09 <sup>B</sup>   | 5.61 ± 0.34 <sup>C</sup> | 29.07 ± 0.52 <sup>B</sup> | 21.67 ± 0.63 <sup>C</sup> | 1.81 ± 0.13 <sup>B</sup> | 0.97 ± 0.04              |
|              | MeOH     | 0.23 ± 0.05              | 0.24 ± 0.06 <sup>B</sup> | 1.13 ± 0.09 <sup>A</sup>   | 2.06 ± 0.18 <sup>A</sup> | 23.05 ± 0.42 <sup>A</sup> | 14.22 ± 0.35 <sup>B</sup> | 1.69 ± 0.08 <sup>B</sup> | 0.92 ± 0.09              |
|              | Water    | 0.27 ± 0.05              | 0.61 ± 0.02 <sup>C</sup> | 1.24 ± 0.04 <sup>A,B</sup> | 2.63 ± 0.11 <sup>B</sup> | 41.29 ± 0.77 <sup>C</sup> | 9.56 ± 0.51 <sup>A</sup>  | 1.38 ± 0.04 <sup>A</sup> | 1.04 ± 0.06              |

Values are expresses as mean values (mg equivalents/g) ± standard deviation (n=3). Superscript letters within each organ part indicate homogeneous sub-classes as resulted from ANOVA ( $p < 0.05$ ; Duncan's post-hoc test)
