# Supplementary material for: Untargeted Phenolic Profiling and Functional Insights of the Aerial Parts and Bulbs of Drimia maritima (L.) Stearn
Source: MDPI journal article supplement (doi:10.3390/plants11050600), 2022-02-23
Supplement: s1 [file s1]

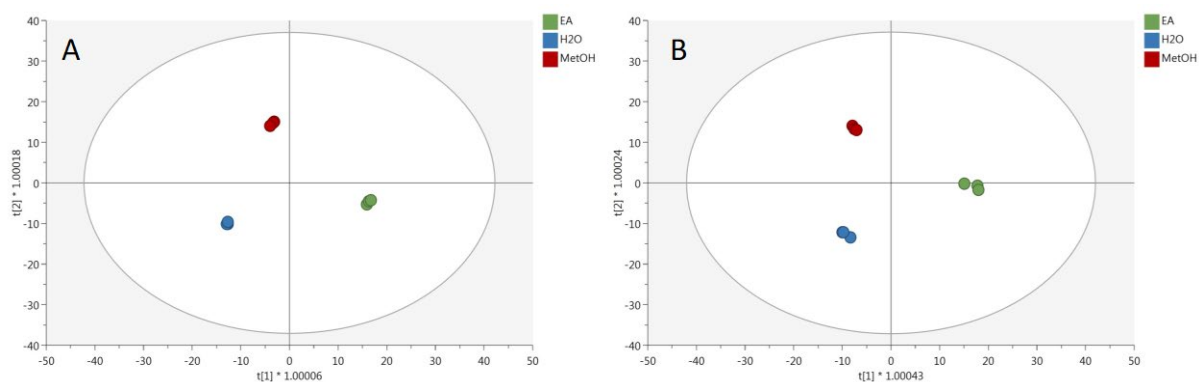

**Figure S1.** orthogonal projection to latent structures discriminant analysis (OPLS-DA) of the phenolic profile of the different *D. maritima* extracts, considering different extraction solvents *i.e.*, ethyl acetate (EA), water (H2O) and methanol (MetOH) for (A) aerial parts characterized by  $R^2Y$  (the goodness-of-fit) = 1 and  $Q^2Y$  (goodness-of-prediction) = 0.950, and (B) bulb parts characterized by  $R^2Y = 1$  and  $Q^2Y = 0.958$ .
