# Supplementary material for: Untargeted Phenolic Profiling and Functional Insights of the Aerial Parts and Bulbs of Drimia maritima (L.) Stearn
Source: Plants (Basel). 2022 Feb 23;11(5):600. doi: 10.3390/plants11050600 (PMC8912325; doi:10.3390/plants11050600)
Supplement: Supplementary file 1 [file plants-11-00600-s001.zip]

Archive with 7 entries (7 files):
- Figure S1 - OPLS-DA models.pdf
- Figure S2 - Validation models.pdf
- Table S1 - TPC and TFC.pdf
- Table S2 - Dataset.xlsx
- Table S3 - semiquantitative analysis.pdf
- Table S4 - VIP markes.pdf
- Table S5 - Pearson's correlation.xlsx
