# Supplementary material for: Untargeted Phenolic Profiling and Functional Insights of the Aerial Parts and Bulbs of Drimia maritima (L.) Stearn
Source: Plants (Basel). 2022 Feb 23;11(5):600. doi: 10.3390/plants11050600 (PMC8912325; doi:10.3390/plants11050600)
Supplement: Supplementary file 1 [file plants-11-00600-s001.zip › Table S2 - Dataset.xlsx]

## Sheet: Data set
			AERIAL PART									BULB PART
			ETHYL ACETATE	ETHYL ACETATE	ETHYL ACETATE	METHANOL	METHANOL	METHANOL	WATER	WATER	WATER	ETHYL ACETATE	ETHYL ACETATE	ETHYL ACETATE	METHANOL	METHANOL	METHANOL	WATER	WATER	WATER
Compound	Class	Sub-class	Sample-Z_1-r001	Sample-Z_1-r002	Sample-Z_1-r003	Sample-Z_3-r001	Sample-Z_3-r002	Sample-Z_3-r003	Sample-Z_2-r001	Sample-Z_2-r002	Sample-Z_2-r003	Sample-Z_4-r001	Sample-Z_4-r002	Sample-Z_4-r003	Sample-Z_6-r001	Sample-Z_6-r002	Sample-Z_6-r003	Sample-Z_5-r001	Sample-Z_5-r002	Sample-Z_5-r003	Retention Time	Mass	Formula	Compound Name	CAS Number
7-Hydroxymatairesinol	Lignans	Lignans	12366880	1	13415457	3.33737e+06	3.31623e+06	3.8002e+06	8.02096e+06	7996490	8094565	1	394651392	1	148801920	146842096	146713952	228358832	237439648	258230560	12.84	374.133	C20 H22 O7	7-Hydroxymatairesinol
Isohydroxymatairesinol	Lignans	Lignans	12366880	1	13415457	3.33737e+06	3.31623e+06	3.8002e+06	8.02096e+06	7996490	8094565	1	394651392	1	148801920	146838864	146706144	228334320	237439648	258230560	12.84	374.133	C20 H22 O7	Isohydroxymatairesinol
Nortrachelogenin	Lignans	Lignans	12366880	1	13415457	3.33737e+06	3.31623e+06	3.8002e+06	8.02096e+06	7996490	8094565	1	394651392	1	148801920	146838864	146706144	228334320	237439648	258230560	12.84	374.133	C20 H22 O7	Nortrachelogenin
7-Oxomatairesinol	Lignans	Lignans	1.5846e+06	1144608	1.351e+06	108750	1	94504.1	1.27907e+06	1.31082e+06	1.32946e+06	212964512	1	192770736	67434432	67351176	69345336	87748704	94309088	93783720	12.0638	372.118	C20 H20 O7	7-Oxomatairesinol
Sesamolinol	Lignans	Lignans	1.5846e+06	1144608	1.351e+06	108750	1	94504.1	1.27907e+06	1.31082e+06	1.32946e+06	212964512	1	192770736	67434432	67351176	69345336	87745432	94309088	93783720	12.0638	372.118	C20 H20 O7	Sesamolinol
Sinensetin	Flavonoids	Flavones	1.5846e+06	1144608	1.351e+06	108750	1	94504.1	1.27907e+06	1.31082e+06	1.32946e+06	212964512	1	192770736	67324976	67351176	69345336	87730152	94309088	93783720	12.0638	372.118	C20 H20 O7	Sinensetin
Tangeretin	Flavonoids	Flavones	1.5846e+06	1144608	1.351e+06	108750	1	94504.1	1.27907e+06	1.31082e+06	1.32946e+06	212964512	1	192770736	67324976	67351176	69345336	87730152	94309088	93783720	12.0638	372.118	C20 H20 O7	Tangeretin
Hydroxytyrosol 4-O-glucoside	Other polyphenols	Tyrosols	19497126	15983468	17846566	754542	915682	1.03215e+06	1.66819e+06	1.60089e+06	1.75068e+06	95925480	102370952	90961760	3.85315e+06	1	2376796	309422	317156	260266	5.01823	316.111	C14 H20 O8	Hydroxytyrosol 4-O-glucoside
Kaempferol 3-O-(2''-rhamnosyl-6''-acetyl-galactoside) 7-O-rhamnoside	Flavonoids	Flavonols	1	1	118349	1	1	1	223445	232096	237326	46118140	35680272	30325296	29899922	30070184	29850968	1	43963520	48922288	12.85	784.228	C34 H40 O21	Kaempferol 3-O-(2''-rhamnosyl-6''-acetyl-galactoside) 7-O-rhamnoside
4-Vinylphenol	Other polyphenols	Alkylphenols	6.26439e+06	1.33824e+06	1.16861e+06	43414328	28650608	43462624	17313908	22143968	17654140	19771992	19217248	23594118	48901064	32876530	32691414	8.37472e+06	43467424	9624166	6.40944	120.057	C8 H8 O	4-Vinylphenol
Matairesinol	Lignans	Lignans	2586068	2.91943e+06	2641308	706272	697161	617416	2.46434e+06	2.47757e+06	2.54704e+06	6838774	4.08458e+06	5.01392e+06	1.78947e+06	3.02281e+06	2.95597e+06	83025472	909963	94439184	10.7156	358.138	C20 H22 O6	Matairesinol
Pinoresinol	Lignans	Lignans	2586068	2.91943e+06	2641308	706272	697161	617416	2.46434e+06	2.47757e+06	2.54704e+06	6838774	4.08458e+06	5.01392e+06	1.78947e+06	3.02281e+06	2.95597e+06	83025472	909963	94439184	10.7156	358.138	C20 H22 O6	Pinoresinol
Dimethylmatairesinol	Lignans	Lignans	41016052	35430004	38297076	8883459	9110198	10016666	1.98525e+06	2018905	2.05852e+06	28143736	24551166	21683204	14710665	14689757	14781578	5454309	5070814	5219768	13.05	386.17	C22 H26 O6	Dimethylmatairesinol
Conidendrin	Lignans	Lignans	316184	403191	350371	100059	102034	172885	300347	316064	309571	41364440	1	41681208	4545100	4.51979e+06	4484925	11986663	12436472	12745603	13.5618	356.123	C20 H20 O6	Conidendrin
Tetramethylscutellarein	Flavonoids	Flavones	4323347	4.13113e+06	1	195329	3.46331e+06	4.17228e+06	4.47292e+06	4890498	5067711	15045845	15158048	14530001	12464624	12815587	4.72208e+06	10430857	5.37505e+06	10130434	6.35059	342.111	C19 H18 O6	Tetramethylscutellarein
Pyrogallol	Other polyphenols	Other polyphenols	23033700	22918426	8020769	5.25532e+06	4.8901e+06	5486149	2749879	2.79069e+06	1	27896302	24266980	24565880	5.40819e+06	5455440	6066653	3.41427e+06	1	3.34405e+06	18.5675	126.032	C6 H6 O3	Pyrogallol
Hydroxycaffeic acid	Phenolic acids	Hydroxycinnamic acids	9586260	8990606	4763091	1039200	390430	699718	559213	759333	551352	19071958	10050877	21429564	17425836	11094350	18951910	815516	450154	471318	2.10667	196.036	C9 H8 O5	Hydroxycaffeic acid
Esculin	Other polyphenols	Hydroxycoumarins	750986	682052	772452	1567262	1.99148e+06	1.22267e+06	1486753	1.57865e+06	1.85419e+06	2.60252e+06	2169741	2.37324e+06	25548676	26156940	25107092	4696812	3.98622e+06	4.23777e+06	4.19667	340.077	C15 H16 O9	Esculin
Malvidin 3-O-arabinoside	Flavonoids	Anthocyanins	3.1606e+06	3947070	4269170	7161261	8.24635e+06	8635838	1.44635e+06	11437844	829760	23258794	21907464	18076178	3660231	3892541	3.76006e+06	14562890	744298	477876	7.38	463.12	C22 H23 O11	Malvidin 3-O-arabinoside
Peonidin 3-O-galactoside	Flavonoids	Anthocyanins	3.1606e+06	3947070	4269170	7161261	8.24635e+06	8635838	1.44635e+06	11437844	829760	23258794	21907464	18076178	3660231	3892541	3.76006e+06	14562890	744298	477876	7.38	463.12	C22 H23 O11	Peonidin 3-O-galactoside
Peonidin 3-O-glucoside	Flavonoids	Anthocyanins	3.1606e+06	3947070	4269170	7161261	8.24635e+06	8635838	1.44635e+06	11437844	829760	23258794	21907464	18076178	3660231	3892541	3.76006e+06	14562890	744298	477876	7.38	463.12	C22 H23 O11	Peonidin 3-O-glucoside
4-Vinylsyringol	Other polyphenols	Alkylmethoxyphenols	330950	278497	265393	280585	260701	241820	1	1	978245	363797	2177791	2.18371e+06	24037086	27487388	27056530	1	1.93432e+06	2.08867e+06	7.666	242.093	C15 H14 O3	4-Vinylsyringol
Episesaminol	Lignans	Lignans	358001	313761	1	1	114791	118900	94669.3	105137	100093	19617140	17765652	20450944	2.70337e+06	2688135	2.66868e+06	6.97906e+06	6.80139e+06	7.00069e+06	13.5038	370.103	C20 H18 O7	Episesaminol
Sesaminol	Lignans	Lignans	358001	313761	1	1	114791	118900	94669.3	105137	100093	19617140	17765652	20450944	2.70337e+06	2688135	2.66868e+06	6.97906e+06	6.80139e+06	7.00069e+06	13.5038	370.103	C20 H18 O7	Sesaminol
Sesamolin	Lignans	Lignans	358001	313761	1	1	114791	118900	94669.3	105137	100093	19617140	17765652	20450944	2.70337e+06	2688135	2.66868e+06	6.97906e+06	6.80139e+06	7.00069e+06	13.5038	370.103	C20 H18 O7	Sesamolin
Todolactol A	Lignans	Lignans	1850548	617453	1.20221e+06	130164	261734	234863	1.55099e+06	323128	1.57743e+06	33884508	9194380	4377093	6.40112e+06	6733855	11707120	4.9852e+06	4.80915e+06	4.46248e+06	7.59889	376.15	C20 H24 O7	Todolactol A
3-Sinapoylquinic acid	Phenolic acids	Hydroxycinnamic acids	893818	1	599048	1201073	1.09255e+06	996104	454656	197721	225726	365741	482277	278332	11947356	11679098	11589517	17668146	14807576	15824972	11.4488	398.126	C18 H22 O10	3-Sinapoylquinic acid
4-Sinapoylquinic acid	Phenolic acids	Hydroxycinnamic acids	893818	1	599048	1201073	1.09255e+06	996104	454656	197721	225726	365741	482277	278332	11947356	11679098	11589517	17668146	14807576	15824972	11.4488	398.126	C18 H22 O10	4-Sinapoylquinic acid
5-Sinapoylquinic acid	Phenolic acids	Hydroxycinnamic acids	893818	1	599048	1201073	1.09255e+06	996104	454656	197721	225726	365741	482277	278332	11947356	11679098	11589517	17668146	14807576	15824972	11.4488	398.126	C18 H22 O10	5-Sinapoylquinic acid
Gardenin B	Flavonoids	Flavones	1	1.40235e+06	181184	1	403143	407142	144623	156135	132214	37722948	4.1596e+06	3333641	2.03097e+06	1927849	1.99024e+06	1.94425e+06	13514241	13575328	12.4281	358.103	C19 H18 O7	Gardenin B
Chrysoeriol 7-O-glucoside	Flavonoids	Flavones	2.69949e+06	3.33959e+06	3.60617e+06	5.89227e+06	6837937	7.13255e+06	1.15762e+06	9300913	687337	19241912	18212922	15025601	3059942	3.24587e+06	3.13922e+06	12013350	640346	385261	7.38	462.112	C22 H22 O11	Chrysoeriol 7-O-glucoside
Isorhamnetin 3-O-rutinoside	Flavonoids	Flavonols	2.69949e+06	3.33959e+06	3.60617e+06	5.89227e+06	6837937	7.13255e+06	1.15762e+06	9300913	687337	19241912	18212922	15025601	3059942	3.24587e+06	3.13922e+06	12013350	640346	385261	7.38	462.112	C22 H22 O11	Isorhamnetin 3-O-rutinoside
p-Anisaldehyde	Other polyphenols	Hydroxybenzaldehydes	819514	838045	869311	509024	1	532794	621212	611402	573772	1	14967212	13680614	3.53009e+06	3541483	3.38223e+06	7592929	6.07012e+06	7.03184e+06	11.0237	136.051	C8 H8 O2	p-Anisaldehyde
Anhydro-secoisolariciresinol	Lignans	Lignans	1	1.19819e+06	856364	306667	380000	309000	445114	461140	456963	3.09567e+06	3.25676e+06	2.82705e+06	3.65336e+06	3.51177e+06	3794613	3459148	16181989	18896134	6.62765	344.164	C20 H24 O5	Anhydro-secoisolariciresinol
Rosmadial	Other polyphenols	Phenolic terpenes	1	1.19819e+06	856364	306667	380000	309000	445114	461140	456963	3.09567e+06	3.25676e+06	2.82705e+06	3.65336e+06	3.51177e+06	3794613	3459148	16181989	18896134	6.62765	344.164	C20 H24 O5	Rosmadial
p-HPEA-AC	Other polyphenols	Tyrosols	565343	629220	578366	1.10658e+06	1.17245e+06	1292970	1	1	1	807418	964697	1067991	15598357	15575769	15239819	3.22389e+06	2.45263e+06	2.13378e+06	9.356	180.079	C10 H12 O3	p-HPEA-AC
5-Tricosenylresorcinol	Other polyphenols	Alkylphenols	920803	935932	1.34823e+06	656219	723790	694671	1.04232e+06	1212072	828612	1.90394e+06	2.04407e+06	2166293	576628	544872	540649	2.85257e+06	23010032	21353246	19.4822	430.383	C29 H50 O2	5-Tricosenylresorcinol
6-Prenylnaringenin	Flavonoids	Flavanones	3207327	1	2.93381e+06	1	119154	1	1.16901e+06	1.30451e+06	1.22527e+06	9000477	6.99375e+06	7.90797e+06	5821872	5569973	5.59521e+06	4.4933e+06	3.792e+06	5219261	8.31267	340.128	C20 H20 O5	6-Prenylnaringenin
8-Prenylnaringenin	Flavonoids	Flavanones	3207327	1	2.93381e+06	1	119154	1	1.16901e+06	1.30451e+06	1.22527e+06	9000477	6.99375e+06	7.90797e+06	5821872	5569973	5.59521e+06	4.4933e+06	3.792e+06	5219261	8.31267	340.128	C20 H20 O5	8-Prenylnaringenin
5-Pentacosylresorcinol	Other polyphenols	Alkylphenols	745283	1.1862e+06	1.77171e+06	1	1	1	1	1	1	1.59044e+06	15255331	1.70222e+06	757571	682349	648236	4.86315e+06	10469293	9203005	21.0933	460.421	C31 H56 O2	5-Pentacosylresorcinol
Pelargonidin 3-O-galactoside	Flavonoids	Anthocyanins	23180860	28669610	31523446	5.60198e+06	66697556	61239360	102105840	96018248	119594472	5.45798e+06	4441437	3.92944e+06	2.03055e+06	2.32646e+06	2.0842e+06	6.97257e+06	6892854	6.05301e+06	7	433.11	C21 H21 O10	Pelargonidin 3-O-galactoside
Pelargonidin 3-O-glucoside	Flavonoids	Anthocyanins	23180860	28669610	31523446	5.60198e+06	66697556	61239360	102105840	96018248	119594472	5.45798e+06	4441437	3.92944e+06	2.03055e+06	2.32646e+06	2.0842e+06	6.97257e+06	6892854	6.05301e+06	7	433.11	C21 H21 O10	Pelargonidin 3-O-glucoside
3,4-DHPEA-EDA	Other polyphenols	Tyrosols	1.63749e+06	1.71988e+06	1.6907e+06	5.36426e+06	5420873	5.90101e+06	355819	366723	382762	1	14356380	13779781	621616	588073	599829	3.51919e+06	3.17318e+06	3.18225e+06	14.3806	320.123	C17 H20 O6	3,4-DHPEA-EDA
5-Heneicosylresorcinol	Other polyphenols	Alkylphenols	1	665740	691298	1	1	1	2.02868e+06	2008943	2.07906e+06	7.8146e+06	8657022	8690252	168529	176403	201321	4522907	3.79556e+06	4.46295e+06	21.88	404.363	C27 H48 O2	5-Heneicosylresorcinol
Dihydroquercetin	Flavonoids	Dihydroflavonols	825578	176102	645561	430670	575516	782527	172609	173223	259443	5006730	4295280	4811799	2.01432e+06	2.1339e+06	1.90701e+06	6131659	5804584	5.59413e+06	4.91	304.056	C15 H12 O7	Dihydroquercetin
Demethyloleuropein	Other polyphenols	Tyrosols	101115	98020.2	97431.9	404715	499663	1	230115	194367	296315	1	1.82405e+06	2.04629e+06	8513044	8845866	119750	7223352	5093071	1	6.886	526.167	C24 H30 O13	Demethyloleuropein
Apigenin 6-C-glucoside	Flavonoids	Flavones	19845080	24326082	26742088	4.53345e+06	55206212	50660148	84349128	79099296	98380712	4.54656e+06	3.72694e+06	3.26329e+06	1.70933e+06	1.99884e+06	1.79709e+06	5.75817e+06	5.74963e+06	5049803	7	432.102	C21 H20 O10	Apigenin 6-C-glucoside
Genistin	Flavonoids	Isoflavonoids	19845080	24326082	26742088	4.53345e+06	55206212	50660148	84349128	79099296	98380712	4.54656e+06	3.72694e+06	3.26329e+06	1.70933e+06	1.99884e+06	1.79709e+06	5.75817e+06	5.74963e+06	5049803	7	432.102	C21 H20 O10	Genistin
Phlorin	Other polyphenols	Other polyphenols	244925	9014174	10189186	546054	539438	463848	1.25511e+06	1.02744e+06	1.10883e+06	4.93052e+06	1	5.46022e+06	6618025	7.77722e+06	7890639	226706	199928	195072	6.03824	288.084	C12 H16 O8	Phlorin
Resveratrol	Stilbenes	Stilbenes	3481615	2.9374e+06	3.11589e+06	382423	345286	363735	803948	788250	1.07876e+06	4187728	4247677	3.72384e+06	1.52378e+06	1.57086e+06	1.59552e+06	4642571	3.90966e+06	4449464	4.475	228.08	C14 H12 O3	Resveratrol
4-Hydroxycoumarin	Other polyphenols	Hydroxycoumarins	1	1691780	1828171	1	2.07884e+06	1.81968e+06	5906810	7327319	6.22992e+06	5.9955e+06	6014024	6150349	2356554	2237840	2264659	1.42669e+06	1.30692e+06	1.33578e+06	4.49875	162.03	C9 H6 O3	4-Hydroxycoumarin
Umbelliferone	Other polyphenols	Hydroxycoumarins	1	1691780	1828171	1	2.07884e+06	1.81968e+06	5906810	7327319	6.22992e+06	5.9955e+06	6014024	6150349	2356554	2237840	2264659	1.42669e+06	1.30692e+06	1.33578e+06	4.49875	162.03	C9 H6 O3	Umbelliferone
Pinosylvin	Stilbenes	Stilbenes	2.12124e+06	1.43273e+06	2.3913e+06	147467	141789	121479	2.39581e+06	411947	174058	1.38712e+06	995912	1.28046e+06	6.97595e+06	3266486	6.28118e+06	4.53545e+06	3.80483e+06	518714	3.88333	212.088	C14 H12 O2	Pinosylvin
1,2-Disinapoylgentiobiose	Phenolic acids	Hydroxycinnamic acids	1	1	1	1.76292e+06	1.20477e+06	1.39684e+06	1.81788e+06	761943	1.48192e+06	589997	429879	232989	7.27146e+06	7.28798e+06	5623594	330236	5.9522e+06	583514	11.1733	754.22	C34 H42 O19	1,2-Disinapoylgentiobiose
Methoxyphenylacetic acid	Phenolic acids	Hydroxyphenylacetic acids	1.0557e+06	911368	1.03981e+06	1.94368e+06	1	1.99038e+06	1.28637e+06	1.32245e+06	1.37266e+06	5581720	4640319	5560387	2510645	2.39602e+06	2.67166e+06	1	832311	3679465	9.09125	166.062	C9 H10 O3	Methoxyphenylacetic acid
Dihydro-p-coumaric acid	Phenolic acids	Hydroxyphenylpropanoic acids	1.0557e+06	911368	1.03981e+06	1.94368e+06	1	1.99038e+06	1.28637e+06	1.32245e+06	1.37266e+06	5581720	4640319	5560387	2510645	2.39602e+06	2.67166e+06	1	832311	3679465	9.09125	166.062	C9 H10 O3	Dihydro-p-coumaric acid
Theaflavin	Flavonoids	Flavanols	5.55615e+06	6825780	7.94955e+06	361019	175789	301871	67718016	82491680	1	1748834	1.85522e+06	1.63547e+06	344660	329615	357325	5950130	5.91492e+06	5.91631e+06	4.33471	564.142	C29 H24 O12	Theaflavin
Coumarin	Other polyphenols	Hydroxycoumarins	1.65552e+06	1.97614e+06	1.98082e+06	15075087	19343248	15326014	2.18088e+06	11050617	2.20788e+06	6.8042e+06	4.83087e+06	4605722	1	1.40089e+06	1.39773e+06	2.52242e+06	1.68404e+06	1	5.42687	146.035	C9 H6 O2	Coumarin
Petunidin 3-O-(6''-acetyl-galactoside)	Flavonoids	Anthocyanins	171277	152384	132056	418756	427322	406662	1.27222e+06	1.30247e+06	1.52898e+06	1	802045	727274	4403885	4.51003e+06	4283550	3.05219e+06	2.55715e+06	2.76615e+06	2.72529	521.141	C24 H25 O13	Petunidin 3-O-(6''-acetyl-galactoside)
Petunidin 3-O-(6''-acetyl-glucoside)	Flavonoids	Anthocyanins	171277	152384	132056	418756	427322	406662	1.27222e+06	1.30247e+06	1.52898e+06	1	802045	727274	4403885	4.51003e+06	4283550	3.05219e+06	2.55715e+06	2.76615e+06	2.72529	521.141	C24 H25 O13	Petunidin 3-O-(6''-acetyl-glucoside)
Procyanidin trimer C1	Flavonoids	Flavanols	1	1	1	1	1	1	1	1	1	653208	377331	571664	4.41164e+06	3.5779e+06	2.82219e+06	3815994	3.34374e+06	3.36878e+06	1.54	866.223	C45 H38 O18	Procyanidin trimer C1
Procyanidin trimer C2	Flavonoids	Flavanols	1	1	1	1	1	1	1	1	1	653208	377331	571664	4.41164e+06	3.5779e+06	2.82219e+06	3815994	3.34374e+06	3.36878e+06	1.54	866.223	C45 H38 O18	Procyanidin trimer C2
Procyanidin trimer EEC	Flavonoids	Flavanols	1	1	1	1	1	1	1	1	1	653208	377331	571664	4.41164e+06	3.5779e+06	2.82219e+06	3815994	3.34374e+06	3.36878e+06	1.54	866.223	C45 H38 O18	Procyanidin trimer EEC
Procyanidin trimer T2	Flavonoids	Flavanols	1	1	1	1	1	1	1	1	1	653208	377331	571664	4.41164e+06	3.5779e+06	2.82219e+06	3815994	3.34374e+06	3.36878e+06	1.54	866.223	C45 H38 O18	Procyanidin trimer T2
3-Hydroxyphloretin 2'-O-glucoside	Flavonoids	Dihydrochalcones	788775	931335	1134490	1.23205e+06	1.1563e+06	942737	693231	626911	659583	205349	158993	138303	136843	135067	213504	7.70116e+06	6.49587e+06	7.11588e+06	6.94833	452.131	C21 H24 O11	3-Hydroxyphloretin 2'-O-glucoside
(+)-Catechin 3-O-glucose	Flavonoids	Flavanols	788775	931335	1134490	1.23205e+06	1.1563e+06	942737	693231	626911	659583	205349	158993	138303	136843	135067	213504	7.70116e+06	6.49587e+06	7.11588e+06	6.94833	452.131	C21 H24 O11	(+)-Catechin 3-O-glucose
Demethoxycurcumin	Other polyphenols	Curcuminoids	1.03235e+06	1.11081e+06	1.2505e+06	81576.6	94347.4	119694	1.51051e+06	1.60551e+06	248153	2.11619e+06	2.61235e+06	332198	4.20304e+06	4.67827e+06	5016643	941675	1.03055e+06	909619	6.12611	338.116	C20 H18 O5	Demethoxycurcumin
Sakuranetin	Flavonoids	Flavanones	1	2.26855e+06	2496022	492643	355903	428858	2.91947e+06	2.98967e+06	3.17387e+06	1.23288e+06	1.25766e+06	1.22682e+06	5.23928e+06	5206100	5485821	470614	1149598	454726	7.90177	286.083	C16 H14 O5	Sakuranetin
Apigenin 6,8-di-C-glucoside	Flavonoids	Flavones	2128256	1	2.94105e+06	11283713	43852176	62103332	10102510	12547987	18830676	1.55703e+06	1607686	1.49969e+06	1.76043e+06	1.78865e+06	1938508	3602519	3.69123e+06	3.54796e+06	5.67118	594.154	C27 H30 O15	Apigenin 6,8-di-C-glucoside
Chrysoeriol 7-O-apiosyl-glucoside	Flavonoids	Flavones	2128256	1	2.94105e+06	11283713	43852176	62103332	10102510	12547987	18830676	1.55703e+06	1607686	1.49969e+06	1.76043e+06	1.78865e+06	1938508	3602519	3.69123e+06	3.54796e+06	5.67118	594.154	C27 H30 O15	Chrysoeriol 7-O-apiosyl-glucoside
Luteolin 7-O-rutinoside	Flavonoids	Flavones	2128256	1	2.94105e+06	11283713	43852176	62103332	10102510	12547987	18830676	1.55703e+06	1607686	1.49969e+06	1.76043e+06	1.78865e+06	1938508	3602519	3.69123e+06	3.54796e+06	5.67118	594.154	C27 H30 O15	Luteolin 7-O-rutinoside
Kaempferol 3-O-galactoside 7-O-rhamnoside	Flavonoids	Flavonols	2128256	1	2.94105e+06	11283713	43852176	62103332	10102510	12547987	18830676	1.55703e+06	1607686	1.49969e+06	1.76043e+06	1.78865e+06	1938508	3602519	3.69123e+06	3.54796e+06	5.67118	594.154	C27 H30 O15	Kaempferol 3-O-galactoside 7-O-rhamnoside
Kaempferol 3-O-rutinoside	Flavonoids	Flavonols	2128256	1	2.94105e+06	11283713	43852176	62103332	10102510	12547987	18830676	1.55703e+06	1607686	1.49969e+06	1.76043e+06	1.78865e+06	1938508	3602519	3.69123e+06	3.54796e+06	5.67118	594.154	C27 H30 O15	Kaempferol 3-O-rutinoside
Pelargonidin 3-O-sambubioside	Flavonoids	Anthocyanins	5.57801e+06	6.94174e+06	8.08314e+06	84226312	10554563	113656864	1	9044277	109186800	505155	1.96403e+06	412538	3318637	3.89015e+06	3461916	527715	494282	6.20472e+06	5.86647	565.151	C26 H29 O14	Pelargonidin 3-O-sambubioside
Apigenin 6,8-C-arabinoside-C-glucoside	Flavonoids	Flavones	5.55615e+06	7761182	8991606	80685912	10004867	108868880	1	8621692	104311392	494378	1.86752e+06	406603	3.1626e+06	3.71449e+06	3.29971e+06	517297	483202	5.93436e+06	5.86412	564.143	C26 H28 O14	Apigenin 6,8-C-arabinoside-C-glucoside
Apigenin 6,8-C-galactoside-C-arabinoside	Flavonoids	Flavones	5.55615e+06	7761182	8991606	80685912	10004867	108868880	1	8621692	104311392	494378	1.86752e+06	406603	3.1626e+06	3.71449e+06	3.29971e+06	517297	483202	5.93436e+06	5.86412	564.143	C26 H28 O14	Apigenin 6,8-C-galactoside-C-arabinoside
Apigenin 7-O-apiosyl-glucoside	Flavonoids	Flavones	5.55615e+06	7761182	8991606	80685912	10004867	108868880	1	8621692	104311392	494378	1.86752e+06	406603	3.1626e+06	3.71449e+06	3.29971e+06	517297	483202	5.93436e+06	5.86412	564.143	C26 H28 O14	Apigenin 7-O-apiosyl-glucoside
Secoisolariciresinol-sesquilignan	Lignans	Lignans	2.34894e+06	2.02413e+06	1.94444e+06	341463	1	1	171213	197598	185349	2.95455e+06	2.53519e+06	2.3624e+06	3.31879e+06	3.45463e+06	3.35432e+06	192364	271025	182772	17.62	558.247	C30 H38 O10	Secoisolariciresinol-sesquilignan
Lariciresinol-sesquilignan	Lignans	Lignans	251963	206475	196699	6.58855e+06	7.16082e+06	5190195	16389002	17850554	17342792	4.53607e+06	2.07582e+06	4295137	2312111	948561	2.55205e+06	1	912188	893605	5.91	556.234	C30 H36 O10	Lariciresinol-sesquilignan
Cinnamoyl glucose	Phenolic acids	Hydroxycinnamic acids	9882764	1	3.06504e+06	1.29555e+06	2787957	1.18368e+06	448241	448779	1	2.66282e+06	2.83272e+06	2.5723e+06	1	1	221471	1	5.02589e+06	5.04652e+06	3.83769	310.109	C15 H18 O7	Cinnamoyl glucose
4-Ethylcatechol	Other polyphenols	Alkylphenols	773503	1.50052e+06	1.01011e+06	951553	1.05414e+06	1.45121e+06	2565584	1.15377e+06	1	1	4787659	5039027	1	1.52707e+06	1	3.52549e+06	3.29803e+06	1	7.87769	138.067	C8 H10 O2	4-Ethylcatechol
Cyanidin 3-O-rutinoside	Flavonoids	Anthocyanins	2.17714e+06	1	3.03449e+06	11766012	45847276	65186556	10547060	13094346	19663430	1.6443e+06	1.69812e+06	1.57544e+06	745133	1.86721e+06	1.72568e+06	2856359	2.85898e+06	2.718e+06	5.72647	595.161	C27 H31 O15	Cyanidin 3-O-rutinoside
Pelargonidin 3-O-sophoroside	Flavonoids	Anthocyanins	2.17714e+06	1	3.03449e+06	11766012	45847276	65186556	10547060	13094346	19663430	1.6443e+06	1.69812e+06	1.57544e+06	745133	1.86721e+06	1.72568e+06	2856359	2.85898e+06	2.718e+06	5.72647	595.161	C27 H31 O15	Pelargonidin 3-O-sophoroside
Petunidin 3-O-rutinoside	Flavonoids	Anthocyanins	2.17714e+06	1	3.03449e+06	11766012	45847276	65186556	10547060	13094346	19663430	1.6443e+06	1.69812e+06	1.57544e+06	745133	1.86721e+06	1.72568e+06	2856359	2.85898e+06	2.718e+06	5.72647	595.161	C27 H31 O15	Petunidin 3-O-rutinoside
Syringaldehyde	Other polyphenols	Hydroxybenzaldehydes	1.17673e+06	1	1	2.49378e+06	1.69988e+06	2.11047e+06	1.08598e+06	107817	1	524977	461632	475231	4.17637e+06	2615464	3680905	3100263	2492671	1	3.55714	182.057	C9 H10 O4	Syringaldehyde
Homovanillic acid	Phenolic acids	Hydroxyphenylacetic acids	1.17673e+06	1	1	2.49378e+06	1.69988e+06	2.11047e+06	1.08598e+06	107817	1	524977	461632	475231	4.17637e+06	2615464	3680905	3100263	2492671	1	3.55714	182.057	C9 H10 O4	Homovanillic acid
Dihydrocaffeic acid	Phenolic acids	Hydroxyphenylpropanoic acids	1.17673e+06	1	1	2.49378e+06	1.69988e+06	2.11047e+06	1.08598e+06	107817	1	524977	461632	475231	4.17637e+06	2615464	3680905	3100263	2492671	1	3.55714	182.057	C9 H10 O4	Dihydrocaffeic acid
Piceatannol	Stilbenes	Stilbenes	2.40467e+06	2.11336e+06	1	380615	327828	972369	8190000	7.70056e+06	8450668	1	1	1	4296452	2.24388e+06	2.93308e+06	2.79513e+06	2478906	2552586	11.2179	244.073	C14 H12 O4	Piceatannol
Gallic acid 4-O-glucoside	Phenolic acids	Hydroxybenzoic acids	267545	223506	261411	736797	628890	749980	8.26728e+06	2592760	7.8735e+06	11020234	346416	372422	1.13853e+06	1.1217e+06	1148194	1.41454e+06	180724	227180	2.535	332.082	C13 H16 O10	Gallic acid 4-O-glucoside
Galloyl glucose	Phenolic acids	Hydroxybenzoic acids	267545	223506	261411	736797	628890	749980	8.26728e+06	2592760	7.8735e+06	11020234	346416	372422	1.13853e+06	1.1217e+06	1148194	1.41454e+06	180724	227180	2.535	332.082	C13 H16 O10	Galloyl glucose
Schottenol ferulate	Phenolic acids	Hydroxycinnamic acids	4383488	6.56996e+06	4422112	6336029	6.16497e+06	6264005	7.75709e+06	7.79624e+06	1.28627e+06	1.12504e+06	1.745e+06	1	534364	541512	583962	6.21385e+06	3.90714e+06	2.12094e+06	18.2682	590.42	C39 H58 O4	Schottenol ferulate
Sitosterol ferulate	Phenolic acids	Hydroxycinnamic acids	4383488	6.56996e+06	4422112	6336029	6.16497e+06	6264005	7.75709e+06	7.79624e+06	1.28627e+06	1.12504e+06	1.745e+06	1	534364	541512	583962	6.21385e+06	3.90714e+06	2.12094e+06	18.2682	590.42	C39 H58 O4	Sitosterol ferulate
p-HPEA-EDA	Other polyphenols	Tyrosols	456666	516233	521805	157949	142770	118670	183946	1	1	1.2789e+06	1.70448e+06	1.6809e+06	2.36773e+06	2.36231e+06	2.61568e+06	1	2.34772e+06	2.36895e+06	12.2213	304.13	C17 H20 O5	p-HPEA-EDA
Rhoifolin 4'-O-glucoside	Flavonoids	Flavones	1	1	1	720102	1.17708e+06	1.16476e+06	414297	674757	979274	516143	528063	345666	210178	7.60583e+06	7.52038e+06	1	1	1	9.79417	740.203	C33 H40 O19	Rhoifolin 4'-O-glucoside
Kaempferol 3-O-(2''-rhamnosyl-galactoside) 7-O-rhamnoside	Flavonoids	Flavonols	1	1	1	720102	1.17708e+06	1.16476e+06	414297	674757	979274	516143	528063	345666	210178	7.60583e+06	7.52038e+06	1	1	1	9.79417	740.203	C33 H40 O19	Kaempferol 3-O-(2''-rhamnosyl-galactoside) 7-O-rhamnoside
Kaempferol 3-O-rhamnosyl-rhamnosyl-glucoside	Flavonoids	Flavonols	1	1	1	720102	1.17708e+06	1.16476e+06	414297	674757	979274	516143	528063	345666	210178	7.60583e+06	7.52038e+06	1	1	1	9.79417	740.203	C33 H40 O19	Kaempferol 3-O-rhamnosyl-rhamnosyl-glucoside
Kaempferol 3-O-xylosyl-rutinoside	Flavonoids	Flavonols	1	1	1	720102	1.17708e+06	1.16476e+06	414297	674757	979274	516143	528063	345666	210178	7.60583e+06	7.52038e+06	1	1	1	9.79417	740.203	C33 H40 O19	Kaempferol 3-O-xylosyl-rutinoside
p-Coumaric acid 4-O-glucoside	Phenolic acids	Hydroxycinnamic acids	2.24109e+06	1.89583e+06	2.39321e+06	267849	245799	265707	147960	2891993	3138322	1.40616e+06	5528563	4364938	536184	629579	487226	1.20214e+06	1.29612e+06	1250777	3.69556	326.097	C15 H18 O8	p-Coumaric acid 4-O-glucoside
p-Coumaroyl glucose	Phenolic acids	Hydroxycinnamic acids	2.24109e+06	1.89583e+06	2.39321e+06	267849	245799	265707	147960	2891993	3138322	1.40616e+06	5528563	4364938	536184	629579	487226	1.20214e+06	1.29612e+06	1250777	3.69556	326.097	C15 H18 O8	p-Coumaroyl glucose
2-Methoxy-5-prop-1-enylphenol	Other polyphenols	Hydroxyphenylpropenes	1	5.29167e+06	6.06741e+06	1	481035	482244	1	1	1	4.64743e+06	4966927	3.10794e+06	1	1	1	1.05619e+06	1.11229e+06	1.75598e+06	9.228	164.083	C10 H12 O2	2-Methoxy-5-prop-1-enylphenol
Eugenol	Other polyphenols	Hydroxyphenylpropenes	1	5.29167e+06	6.06741e+06	1	481035	482244	1	1	1	4.64743e+06	4966927	3.10794e+06	1	1	1	1.05619e+06	1.11229e+06	1.75598e+06	9.228	164.083	C10 H12 O2	Eugenol
Caffeic acid	Phenolic acids	Hydroxycinnamic acids	630152	652861	466262	453567	713926	666494	1	382446	546353	5.94536e+06	3.76161e+06	1	1.091e+06	494503	529707	2.01327e+06	560604	1.95559e+06	5.23313	180.041	C9 H8 O4	Caffeic acid
Rosmarinic acid	Phenolic acids	Hydroxycinnamic acids	1.04666e+06	988036	1104430	159028	128750	126053	2.42699e+06	2516517	2.79098e+06	145861	1	111521	3.28734e+06	3328616	1	2808675	2.25526e+06	4.36536e+06	2.8875	360.087	C18 H16 O8	Rosmarinic acid
3-Methylcatechol	Other polyphenols	Alkylphenols	1	3.52122e+06	1	4344021	3.71795e+06	3468316	1	2659252	4513600	3352244	1	4.66002e+06	1	1398258	1.30678e+06	1.72249e+06	1.61289e+06	1.86186e+06	7.73615	124.053	C7 H8 O2	3-Methylcatechol
4-Methylcatechol	Other polyphenols	Alkylphenols	1	3.52122e+06	1	4344021	3.71795e+06	3468316	1	2659252	4513600	3352244	1	4.66002e+06	1	1398258	1.30678e+06	1.72249e+06	1.61289e+06	1.86186e+06	7.73615	124.053	C7 H8 O2	4-Methylcatechol
Guaiacol	Other polyphenols	Methoxyphenols	1	3.52122e+06	1	4344021	3.71795e+06	3468316	1	2659252	4513600	3352244	1	4.66002e+06	1	1398258	1.30678e+06	1.72249e+06	1.61289e+06	1.86186e+06	7.73615	124.053	C7 H8 O2	Guaiacol
4-Ethylguaiacol	Other polyphenols	Alkylmethoxyphenols	4540142	1	1	211973	205265	199913	160704	214745	200114	4.58176e+06	2652011	3.46569e+06	797188	838492	858577	900573	889774	818840	8.13687	152.085	C9 H12 O2	4-Ethylguaiacol
Cyanidin 3-O-galactoside	Flavonoids	Anthocyanins	1341135	1.66617e+06	1	13006022	12985482	12150325	6517244	25302058	27100104	1.35119e+06	1.50815e+06	1.24418e+06	559947	654298	585739	3.21692e+06	3.03665e+06	3.07358e+06	6.56882	449.106	C21 H21 O11	Cyanidin 3-O-galactoside
Cyanidin 3-O-glucoside	Flavonoids	Anthocyanins	1341135	1.66617e+06	1	13006022	12985482	12150325	6517244	25302058	27100104	1.35119e+06	1.50815e+06	1.24418e+06	559947	654298	585739	3.21692e+06	3.03665e+06	3.07358e+06	6.56882	449.106	C21 H21 O11	Cyanidin 3-O-glucoside
Peonidin 3-O-arabinoside	Flavonoids	Anthocyanins	1341135	1.66617e+06	1	13006022	12985482	12150325	6517244	25302058	27100104	1.35119e+06	1.50815e+06	1.24418e+06	559947	654298	585739	3.21692e+06	3.03665e+06	3.07358e+06	6.56882	449.106	C21 H21 O11	Peonidin 3-O-arabinoside
Petunidin 3-O-arabinoside	Flavonoids	Anthocyanins	1341135	1.66617e+06	1	13006022	12985482	12150325	6517244	25302058	27100104	1.35119e+06	1.50815e+06	1.24418e+06	559947	654298	585739	3.21692e+06	3.03665e+06	3.07358e+06	6.56882	449.106	C21 H21 O11	Petunidin 3-O-arabinoside
Kaempferol 3-O-(6''-acetyl-galactoside) 7-O-rhamnoside	Flavonoids	Flavonols	1	1	1	720521	633949	579818	127911	83194.1	139194	1	1	1	3.99266e+06	4.41286e+06	5.64147e+06	1	1	1	8.33	636.165	C29 H32 O16	Kaempferol 3-O-(6''-acetyl-galactoside) 7-O-rhamnoside
d-Viniferin	Stilbenes	Stilbenes	331836	260251	435262	265695	313347	241935	673510	232380	789271	1	1.03435e+06	647375	2.64611e+06	328624	344687	3.20725e+06	2795088	2942919	2.39588	454.139	C28 H22 O6	d-Viniferin
e-Viniferin	Stilbenes	Stilbenes	331836	260251	435262	265695	313347	241935	673510	232380	789271	1	1.03435e+06	647375	2.64611e+06	328624	344687	3.20725e+06	2795088	2942919	2.39588	454.139	C28 H22 O6	e-Viniferin
Pallidol	Stilbenes	Stilbenes	331836	260251	435262	265695	313347	241935	673510	232380	789271	1	1.03435e+06	647375	2.64611e+06	328624	344687	3.20725e+06	2795088	2942919	2.39588	454.139	C28 H22 O6	Pallidol
m-Coumaric acid	Phenolic acids	Hydroxycinnamic acids	4.34531e+06	5081435	3.2548e+06	731986	814551	790597	974323	902074	1.42457e+06	2.48229e+06	1723729	2.17267e+06	1.49811e+06	1.51669e+06	1.46004e+06	1.0616e+06	937203	977965	7.67833	164.046	C9 H8 O3	m-Coumaric acid
o-Coumaric acid	Phenolic acids	Hydroxycinnamic acids	4.34531e+06	5081435	3.2548e+06	731986	814551	790597	974323	902074	1.42457e+06	2.48229e+06	1723729	2.17267e+06	1.49811e+06	1.51669e+06	1.46004e+06	1.0616e+06	937203	977965	7.67833	164.046	C9 H8 O3	o-Coumaric acid
p-Coumaric acid	Phenolic acids	Hydroxycinnamic acids	4.34531e+06	5081435	3.2548e+06	731986	814551	790597	974323	902074	1.42457e+06	2.48229e+06	1723729	2.17267e+06	1.49811e+06	1.51669e+06	1.46004e+06	1.0616e+06	937203	977965	7.67833	164.046	C9 H8 O3	p-Coumaric acid
3-p-Coumaroylquinic acid	Phenolic acids	Hydroxycinnamic acids	1	408602	234227	1	1	1	1.44771e+06	671221	1	2.98672e+06	3.39156e+06	2870956	572060	1.92969e+06	1251656	138205	405962	101705	3.71077	338.099	C16 H18 O8	3-p-Coumaroylquinic acid
4-p-Coumaroylquinic acid	Phenolic acids	Hydroxycinnamic acids	1	408602	234227	1	1	1	1.44771e+06	671221	1	2.98672e+06	3.39156e+06	2870956	572060	1.92969e+06	1251656	138205	405962	101705	3.71077	338.099	C16 H18 O8	4-p-Coumaroylquinic acid
5-p-Coumaroylquinic acid	Phenolic acids	Hydroxycinnamic acids	1	408602	234227	1	1	1	1.44771e+06	671221	1	2.98672e+06	3.39156e+06	2870956	572060	1.92969e+06	1251656	138205	405962	101705	3.71077	338.099	C16 H18 O8	5-p-Coumaroylquinic acid
p-Coumaroylquinic acid	Phenolic acids	Hydroxycinnamic acids	1	408602	234227	1	1	1	1.44771e+06	671221	1	2.98672e+06	3.39156e+06	2870956	572060	1.92969e+06	1251656	138205	405962	101705	3.71077	338.099	C16 H18 O8	p-Coumaroylquinic acid
5-Heptadecylresorcinol	Other polyphenols	Alkylphenols	1	1	1	135946	113103	123420	2.70742e+06	278972	2.6449e+06	1	1	116044	4.22936e+06	4199773	3797290	396831	413631	285142	13.5777	348.299	C23 H40 O2	5-Heptadecylresorcinol
Naringin	Flavonoids	Flavanones	1	891907	944791	11359810	15474886	1	326689	384440	767618	4.16726e+06	3895799	3.95036e+06	229153	211250	226277	221330	224700	184690	8.825	580.176	C27 H32 O14	Naringin
Narirutin	Flavonoids	Flavanones	1	891907	944791	11359810	15474886	1	326689	384440	767618	4.16726e+06	3895799	3.95036e+06	229153	211250	226277	221330	224700	184690	8.825	580.176	C27 H32 O14	Narirutin
5-Nonadecenylresorcinol	Other polyphenols	Alkylphenols	952011	1	1.04975e+06	123128	118308	301695	2.7402e+06	2.75933e+06	2.61175e+06	1.38583e+06	1.59444e+06	2.16893e+06	453783	712427	304967	1.70395e+06	2.51279e+06	2.30991e+06	15.2576	374.321	C25 H42 O2	5-Nonadecenylresorcinol
3-Feruloylquinic acid	Phenolic acids	Hydroxycinnamic acids	1.17035e+06	625371	1.0666e+06	1	2.24225e+06	274609	873942	1	904695	1.06698e+06	903138	1.6727e+06	3532975	3.18624e+06	319480	884174	656490	725684	8.21938	368.111	C17 H20 O9	3-Feruloylquinic acid
4-Feruloylquinic acid	Phenolic acids	Hydroxycinnamic acids	1.17035e+06	625371	1.0666e+06	1	2.24225e+06	274609	873942	1	904695	1.06698e+06	903138	1.6727e+06	3532975	3.18624e+06	319480	884174	656490	725684	8.21938	368.111	C17 H20 O9	4-Feruloylquinic acid
5-Feruloylquinic acid	Phenolic acids	Hydroxycinnamic acids	1.17035e+06	625371	1.0666e+06	1	2.24225e+06	274609	873942	1	904695	1.06698e+06	903138	1.6727e+06	3532975	3.18624e+06	319480	884174	656490	725684	8.21938	368.111	C17 H20 O9	5-Feruloylquinic acid
6-Hydroxyluteolin 7-O-rhamnoside	Flavonoids	Flavones	1.50856e+06	1.75078e+06	1	10662283	10657386	9997315	5715889	20788702	22279472	1.13221e+06	1.2516e+06	1.03872e+06	474471	603475	486176	2.63172e+06	2.4868e+06	2.50969e+06	6.56882	448.098	C21 H20 O11	6-Hydroxyluteolin 7-O-rhamnoside
Luteolin 6-C-glucoside	Flavonoids	Flavones	1.50856e+06	1.75078e+06	1	10662283	10657386	9997315	5715889	20788702	22279472	1.13221e+06	1.2516e+06	1.03872e+06	474471	603475	486176	2.63172e+06	2.4868e+06	2.50969e+06	6.56882	448.098	C21 H20 O11	Luteolin 6-C-glucoside
Luteolin 7-O-glucoside	Flavonoids	Flavones	1.50856e+06	1.75078e+06	1	10662283	10657386	9997315	5715889	20788702	22279472	1.13221e+06	1.2516e+06	1.03872e+06	474471	603475	486176	2.63172e+06	2.4868e+06	2.50969e+06	6.56882	448.098	C21 H20 O11	Luteolin 7-O-glucoside
Kaempferol 3-O-galactoside	Flavonoids	Flavonols	1.50856e+06	1.75078e+06	1	10662283	10657386	9997315	5715889	20788702	22279472	1.13221e+06	1.2516e+06	1.03872e+06	474471	603475	486176	2.63172e+06	2.4868e+06	2.50969e+06	6.56882	448.098	C21 H20 O11	Kaempferol 3-O-galactoside
Kaempferol 3-O-glucoside	Flavonoids	Flavonols	1.50856e+06	1.75078e+06	1	10662283	10657386	9997315	5715889	20788702	22279472	1.13221e+06	1.2516e+06	1.03872e+06	474471	603475	486176	2.63172e+06	2.4868e+06	2.50969e+06	6.56882	448.098	C21 H20 O11	Kaempferol 3-O-glucoside
Quercetin 3-O-rhamnoside	Flavonoids	Flavonols	1.50856e+06	1.75078e+06	1	10662283	10657386	9997315	5715889	20788702	22279472	1.13221e+06	1.2516e+06	1.03872e+06	474471	603475	486176	2.63172e+06	2.4868e+06	2.50969e+06	6.56882	448.098	C21 H20 O11	Quercetin 3-O-rhamnoside
p-Coumaric acid ethyl ester	Phenolic acids	Hydroxycinnamic acids	5615456	4233142	1	1.76123e+06	1.69953e+06	1.71109e+06	2.97667e+06	4.03501e+06	1	1.9056e+06	1.9114e+06	1.82911e+06	481736	1.96201e+06	2.2548e+06	322840	1.63974e+06	299597	8.4875	192.079	C11 H12 O3	p-Coumaric acid ethyl ester
Cinnamic acid	Phenolic acids	Hydroxycinnamic acids	2.84178e+06	2961568	3.30567e+06	1	4321804	5053212	4.95424e+06	6313942	5643274	3056669	410449	320806	1.96046e+06	1.51518e+06	1.94703e+06	1.10846e+06	1.07235e+06	1.12623e+06	5.57	148.052	C9 H8 O2	Cinnamic acid
Piceatannol 3-O-glucoside	Stilbenes	Stilbenes	135137	1	99456.5	977551	776963	763045	616725	610972	1	3.86632e+06	4105804	3.51527e+06	132173	147251	1	284609	1	284799	8.37571	406.127	C20 H22 O9	Piceatannol 3-O-glucoside
7-Hydroxysecoisolariciresinol	Lignans	Lignans	11205902	2.88624e+06	1	1	1	1	1	1	1	2.2342e+06	2402561	3091169	708588	508981	498569	968232	928047	968509	10.3645	374.207	C22 H30 O5	7-Hydroxysecoisolariciresinol
Ferulaldehyde	Other polyphenols	Hydroxycinnamaldehydes	15446396	19372820	201641	3.6116e+06	4.39479e+06	4.20544e+06	1.05755e+06	545366	669086	2.76437e+06	2.32815e+06	2.15426e+06	1.24349e+06	638134	893704	1.17898e+06	1.07309e+06	1	7.71765	178.061	C10 H10 O3	Ferulaldehyde
Mellein	Other polyphenols	Hydroxycoumarins	15446396	19372820	201641	3.6116e+06	4.39479e+06	4.20544e+06	1.05755e+06	545366	669086	2.76437e+06	2.32815e+06	2.15426e+06	1.24349e+06	638134	893704	1.17898e+06	1.07309e+06	1	7.71765	178.061	C10 H10 O3	Mellein
Peonidin 3-O-(6''-p-coumaroyl-glucoside)	Flavonoids	Anthocyanins	1.46169e+06	1.84383e+06	1.78717e+06	1	411678	270348	1.34878e+06	1.04055e+06	1.36229e+06	652255	591294	709968	1	3406909	3460683	1.04211e+06	1.19745e+06	1.1997e+06	13.6519	609.17	C31 H29 O13	Peonidin 3-O-(6''-p-coumaroyl-glucoside)
Pigment A	Flavonoids	Anthocyanins	1.46169e+06	1.84383e+06	1.78717e+06	1	411678	270348	1.34878e+06	1.04055e+06	1.36229e+06	652255	591294	709968	1	3406909	3460683	1.04211e+06	1.19745e+06	1.1997e+06	13.6519	609.17	C31 H29 O13	Pigment A
Bisdemethoxycurcumin	Other polyphenols	Curcuminoids	808924	717735	764772	218480	369217	244484	1	1	1	1	3.41143e+06	3.19565e+06	535848	1.52075e+06	1.40768e+06	380032	351696	1.42809e+06	6.06143	308.106	C19 H16 O4	Bisdemethoxycurcumin
Ligstroside-aglycone	Other polyphenols	Tyrosols	215725	156005	1	1.50336e+06	681880	442471	128490	225726	1	4.05146e+06	2.21445e+06	2921914	698864	737176	788316	727639	1	1	6.01286	362.141	C19 H22 O7	Ligstroside-aglycone
p-HPEA-EA	Other polyphenols	Tyrosols	215725	156005	1	1.50336e+06	681880	442471	128490	225726	1	4.05146e+06	2.21445e+06	2921914	698864	737176	788316	727639	1	1	6.01286	362.141	C19 H22 O7	p-HPEA-EA
Catechol	Other polyphenols	Other polyphenols	1	1.12393e+06	820424	1	1	417494	1	1	1	582852	901415	597306	1.78118e+06	3.84962e+06	847730	1.78942e+06	1762648	1	8.38091	110.036	C6 H6 O2	Catechol
(-)-Epicatechin-(2a-7)(4a-8)-epicatechin 3-O-galactoside	Flavonoids	Flavanols	1	1	1	482684	799258	1.01633e+06	311420	142476	926749	401858	230871	349530	2841912	2.72308e+06	1.13829e+06	1.56554e+06	1.2628e+06	1.33951e+06	3.794	706.182	C36 H34 O15	(-)-Epicatechin-(2a-7)(4a-8)-epicatechin 3-O-galactoside
Resveratrol 3-O-glucoside	Stilbenes	Stilbenes	474063	439111	121890	126362	143022	137589	574295	608212	595085	1.85184e+06	1.99174e+06	2.05682e+06	1.42473e+06	1919109	1.15672e+06	469242	468193	453567	7.30333	390.13	C20 H22 O8	Resveratrol 3-O-glucoside
Cirsilineol	Flavonoids	Flavones	526667	337306	306400	799506	342899	413948	1.74794e+06	1.57708e+06	482159	1.5165e+06	3.24661e+06	1.63144e+06	376254	335777	325044	1	2.11997e+06	2.10297e+06	10.9365	344.089	C18 H16 O7	Cirsilineol
Eupatorin	Flavonoids	Flavones	526667	337306	306400	799506	342899	413948	1.74794e+06	1.57708e+06	482159	1.5165e+06	3.24661e+06	1.63144e+06	376254	335777	325044	1	2.11997e+06	2.10297e+06	10.9365	344.089	C18 H16 O7	Eupatorin
Pebrellin	Flavonoids	Flavones	526667	337306	306400	799506	342899	413948	1.74794e+06	1.57708e+06	482159	1.5165e+06	3.24661e+06	1.63144e+06	376254	335777	325044	1	2.11997e+06	2.10297e+06	10.9365	344.089	C18 H16 O7	Pebrellin
Cyanidin 3-O-arabinoside	Flavonoids	Anthocyanins	1.21901e+06	900452	1	610763	355292	389047	1.05367e+06	512970	818174	2.21163e+06	2.63585e+06	2.41496e+06	1	1	1	1.42946e+06	1423696	1.45463e+06	6.25714	419.1	C20 H19 O10	Cyanidin 3-O-arabinoside
Cyanidin 3-O-xyloside	Flavonoids	Anthocyanins	1.21901e+06	900452	1	610763	355292	389047	1.05367e+06	512970	818174	2.21163e+06	2.63585e+06	2.41496e+06	1	1	1	1.42946e+06	1423696	1.45463e+06	6.25714	419.1	C20 H19 O10	Cyanidin 3-O-xyloside
Xanthohumol	Flavonoids	Chalcones	536605	1	1	132744	154402	1	11307688	1	1.31384e+06	1.67258e+06	1	1	3.09764e+06	3225671	1	1.64953e+06	1.60193e+06	1	4.772	354.144	C21 H22 O5	Xanthohumol
Isoxanthohumol	Flavonoids	Flavanones	536605	1	1	132744	154402	1	11307688	1	1.31384e+06	1.67258e+06	1	1	3.09764e+06	3225671	1	1.64953e+06	1.60193e+06	1	4.772	354.144	C21 H22 O5	Isoxanthohumol
Avenanthramide 2p	Phenolic acids	Hydroxycinnamic acids	1.77028e+06	462515	793434	218937	187116	215751	588129	964714	779730	286017	373371	333956	1.91878e+06	2.27107e+06	2.13066e+06	1.47978e+06	1.45676e+06	909901	2.25333	299.079	C16 H13 N O5	Avenanthramide 2p
Hydroxytyrosol	Other polyphenols	Tyrosols	543645	701362	676809	4.43803e+06	5.88818e+06	5973974	2.44162e+06	1	2.04647e+06	2.51122e+06	1	2.79381e+06	1	113420	1	1.66061e+06	2.02755e+06	1.95291e+06	16.4521	154.064	C8 H10 O3	Hydroxytyrosol
Medioresinol	Lignans	Lignans	330622	318826	286496	1.11788e+06	1.09736e+06	1.15994e+06	342894	353055	347477	387968	382403	377262	2.72839e+06	2.70102e+06	2.87859e+06	1	860633	573365	12.2682	388.15	C21 H24 O7	Medioresinol
Trachelogenin	Lignans	Lignans	330622	318826	286496	1.11788e+06	1.09736e+06	1.15994e+06	342894	353055	347477	387968	382403	377262	2.72839e+06	2.70102e+06	2.87859e+06	1	860633	573365	12.2682	388.15	C21 H24 O7	Trachelogenin
5-Heneicosenylresorcinol	Other polyphenols	Alkylphenols	1.42564e+06	1.62569e+06	1.38071e+06	814660	985859	887641	2.19617e+06	2.51071e+06	2.53855e+06	866781	1.25214e+06	1.08026e+06	731485	769906	785993	411722	2.46919e+06	2490417	17.9578	402.354	C27 H46 O2	5-Heneicosenylresorcinol
Vanillin	Other polyphenols	Hydroxybenzaldehydes	358219	369948	1.74636e+06	1105241	988328	934086	905883	783506	916232	1	3198782	3.78491e+06	1	641070	577020	918821	872863	752051	5.44	152.046	C8 H8 O3	Vanillin
Pelargonidin 3-O-glucosyl-rutinoside	Flavonoids	Anthocyanins	1	1	1	1	321523	224558	438371	747342	1.091e+06	152124	139564	111742	279321	230411	8.02826e+06	370930	571919	639036	10.6214	741.243	C33 H41 O19	Pelargonidin 3-O-glucosyl-rutinoside
Phloretin	Flavonoids	Dihydrochalcones	622317	697428	668812	219972	237861	248759	1	1.82658e+06	1.63887e+06	2.13333e+06	2.15116e+06	2.39817e+06	254321	1.24244e+06	332502	618987	610593	693990	9.64823	274.084	C15 H14 O5	Phloretin
Dihydromyricetin 3-O-rhamnoside	Flavonoids	Dihydroflavonols	865289	307540	388256	1	1	118114	101278	305679	87612.2	796836	832987	1389956	1687883	1717771	1.64691e+06	883266	657972	666010	3.48875	466.114	C21 H22 O12	Dihydromyricetin 3-O-rhamnoside
1,4-Naphtoquinone	Other polyphenols	Naphtoquinones	5.96223e+06	1	8062107	828458	611754	640942	275268	312390	197448	3.24795e+06	3429643	2.77381e+06	183580	210982	165238	233044	1	1	2.02	158.039	C10 H6 O2	1,4-Naphtoquinone
4-Hydroxybenzaldehyde	Other polyphenols	Hydroxybenzaldehydes	3.15361e+06	2.33358e+06	1.9375e+06	308526	117005	966663	1.48794e+06	1.77983e+06	1.3414e+06	2773039	2044134	2.2569e+06	294702	1.69643e+06	1	1	467564	539532	3.79875	122.037	C7 H6 O2	4-Hydroxybenzaldehyde
Benzoic acid	Phenolic acids	Hydroxybenzoic acids	3.15361e+06	2.33358e+06	1.9375e+06	308526	117005	966663	1.48794e+06	1.77983e+06	1.3414e+06	2773039	2044134	2.2569e+06	294702	1.69643e+06	1	1	467564	539532	3.79875	122.037	C7 H6 O2	Benzoic acid
4-Hydroxyphenylacetic acid	Phenolic acids	Hydroxyphenylacetic acids	358219	369948	1.74636e+06	1105241	988328	934086	905883	783506	916232	1	3198782	3.78491e+06	1	641070	577020	918821	872863	1	5.35867	152.046	C8 H8 O3	4-Hydroxyphenylacetic acid
Secoisolariciresinol	Lignans	Lignans	7.67969e+06	1	6.9267e+06	230776	141516	1	2.19378e+06	2.48771e+06	2.13635e+06	1	3.07737e+06	1	1.13949e+06	1.46248e+06	1.4192e+06	1.09374e+06	1079101	671270	9.90286	362.175	C20 H26 O6	Secoisolariciresinol
Cyanidin 3-O-(6''-p-coumaroyl-glucoside)	Flavonoids	Anthocyanins	2.5319e+06	1.15942e+06	3.82925e+06	11766012	1	17228746	38212584	248801	349688	3288716	2.9645e+06	1	231318	225395	234438	960368	879258	1.00501e+06	9.58437	595.157	C30 H27 O13	Cyanidin 3-O-(6''-p-coumaroyl-glucoside)
Resveratrol 5-O-glucoside	Stilbenes	Stilbenes	474063	439111	121890	126362	143022	137589	574295	608212	595085	1.85184e+06	1.99174e+06	1	1.42473e+06	1919109	1.15672e+06	469242	468193	453567	7.61647	390.13	C20 H22 O8	Resveratrol 5-O-glucoside
Narirutin 4'-O-glucoside	Flavonoids	Flavanones	1	1	1	1	1	1	81750.6	153049	198328	301164	197047	265118	2.8193e+06	2.87152e+06	2754677	97891.9	165451	184250	9.185	742.25	C33 H42 O19	Narirutin 4'-O-glucoside
Didymin	Flavonoids	Flavanones	133499	146760	167913	1	224453	1	1	318931	281105	208865	317454	260986	1.37099e+06	1.64566e+06	1.60621e+06	1	470660	3.64224e+06	6.76929	594.19	C28 H34 O14	Didymin
Poncirin	Flavonoids	Flavanones	133499	146760	167913	1	224453	1	1	318931	281105	208865	317454	260986	1.37099e+06	1.64566e+06	1.60621e+06	1	470660	3.64224e+06	6.76929	594.19	C28 H34 O14	Poncirin
Ferulic acid	Phenolic acids	Hydroxycinnamic acids	2.46499e+06	2.87674e+06	1.72331e+06	424991	502778	676816	1.97792e+06	877717	1.08032e+06	2109364	1.19699e+06	1190380	703488	880882	977930	545347	716363	1.13607e+06	6.99778	194.056	C10 H10 O4	Ferulic acid
Isoferulic acid	Phenolic acids	Hydroxycinnamic acids	2.46499e+06	2.87674e+06	1.72331e+06	424991	502778	676816	1.97792e+06	877717	1.08032e+06	2109364	1.19699e+06	1190380	703488	880882	977930	545347	716363	1.13607e+06	6.99778	194.056	C10 H10 O4	Isoferulic acid
Eriocitrin	Flavonoids	Flavanones	568686	1	784230	3297395	4.48106e+06	18012830	1	3.57821e+06	18614036	1289316	1.29537e+06	1.156e+06	1.28734e+06	1.8393e+06	591431	488455	783795	718829	4.395	596.165	C27 H32 O15	Eriocitrin
Neoeriocitrin	Flavonoids	Flavanones	568686	1	784230	3297395	4.48106e+06	18012830	1	3.57821e+06	18614036	1289316	1.29537e+06	1.156e+06	1.28734e+06	1.8393e+06	591431	488455	783795	718829	4.395	596.165	C27 H32 O15	Neoeriocitrin
Cirsimaritin	Flavonoids	Flavones	422157	458294	533369	2.53998e+06	1.92697e+06	2.1102e+06	1	3.21608e+06	1.75197e+06	2.11042e+06	1.91404e+06	2258587	304193	301966	300478	674389	691864	796613	10.3559	314.077	C17 H14 O6	Cirsimaritin
3-Methoxynobiletin	Flavonoids	Flavonols	407685	1	142359	1	182905	168045	723081	623406	798102	336449	438497	1	1.82597e+06	2.03882e+06	2.04988e+06	884675	843308	850417	4.36467	432.139	C22 H24 O9	3-Methoxynobiletin
Oleoside dimethylester	Other polyphenols	Tyrosols	563407	506165	573677	872259	1.24941e+06	1.24204e+06	739590	833193	761825	786727	931723	765861	646229	798278	796680	1.5866e+06	1.31694e+06	1.51018e+06	2.96778	418.151	C18 H26 O11	Oleoside dimethylester
Acetyl eugenol	Other polyphenols	Hydroxyphenylpropenes	1.17266e+06	1.02021e+06	1.39827e+06	300850	266898	289772	289717	1	305465	1.59755e+06	1.66181e+06	1.01452e+06	1.08764e+06	844106	2511132	184579	203440	1	10.1069	206.092	C12 H14 O3	Acetyl eugenol
Peonidin	Flavonoids	Anthocyanins	1	763614	1	471975	470856	533491	1.3901e+06	1.429e+06	1.40991e+06	1.543e+06	1.56626e+06	1.72921e+06	480762	439788	462148	899675	918102	994831	11.8	301.069	C16 H13 O6	Peonidin
Gallic acid ethyl ester	Phenolic acids	Hydroxybenzoic acids	5.5971e+06	4.91918e+06	1	919942	478522	707262	1	519089	273434	228669	202502	5442120	2.23034e+06	253152	289775	182675	115171	1	5.52667	198.051	C9 H10 O5	Gallic acid ethyl ester
Syringic acid	Phenolic acids	Hydroxybenzoic acids	5.5971e+06	4.91918e+06	1	919942	478522	707262	1	519089	273434	228669	202502	5442120	2.23034e+06	253152	289775	182675	115171	1	5.52667	198.051	C9 H10 O5	Syringic acid
Hesperetin	Flavonoids	Flavanones	4818370	3.89467e+06	4551767	819767	1166486	748361	1.28689e+06	928662	509930	2.10301e+06	2.44955e+06	1	767343	1.15405e+06	818429	725970	245518	581403	3.15294	302.08	C16 H14 O6	Hesperetin
Epirosmanol	Other polyphenols	Phenolic terpenes	1	1	1	2.08232e+06	2.05454e+06	1	500937	423440	1	1	2.18142e+06	2.09602e+06	2.05537e+06	2.3659e+06	1	1	1	1	9.5525	346.176	C20 H26 O5	Epirosmanol
Rosmanol	Other polyphenols	Phenolic terpenes	1	1	1	2.08232e+06	2.05454e+06	1	500937	423440	1	1	2.18142e+06	2.09602e+06	2.05537e+06	2.3659e+06	1	1	1	1	9.5525	346.176	C20 H26 O5	Rosmanol
Curcumin	Other polyphenols	Curcuminoids	252411	1	193770	2.83756e+06	2.35618e+06	2.78731e+06	873942	1103369	904695	2.05159e+06	2.13134e+06	1.84407e+06	815149	1	1.30837e+06	150692	169979	154589	4.46063	368.12	C21 H20 O6	Curcumin
Sinapaldehyde	Other polyphenols	Hydroxycinnamaldehydes	701930	1	683048	534729	437105	352184	426521	465349	495816	531697	515024	418803	1.31522e+06	1.28724e+06	1.26857e+06	1.40263e+06	1309433	554111	9.59	208.072	C11 H12 O4	Sinapaldehyde
Caffeic acid ethyl ester	Phenolic acids	Hydroxycinnamic acids	701930	1	683048	534729	437105	352184	426521	465349	495816	531697	515024	418803	1.31522e+06	1.28724e+06	1.26857e+06	1.40263e+06	1309433	554111	9.59	208.072	C11 H12 O4	Caffeic acid ethyl ester
Anethole	Other polyphenols	Hydroxyphenylpropenes	1	1	1	1.676e+06	1.63304e+06	687634	1	1	580173	307997	1.80695e+06	2.22027e+06	1	1.42841e+06	1197156	913496	1	547530	12.0464	148.087	C10 H12 O	Anethole
Estragole	Other polyphenols	Hydroxyphenylpropenes	1	1	1	1.676e+06	1.63304e+06	687634	1	1	580173	307997	1.80695e+06	2.22027e+06	1	1.42841e+06	1197156	913496	1	547530	12.0464	148.087	C10 H12 O	Estragole
Tyrosol	Other polyphenols	Tyrosols	773503	1.50052e+06	1.01011e+06	951553	1.05414e+06	1.49515e+06	2565584	1.15377e+06	1	1	1	1	1	1.4685e+06	1	3.52549e+06	3.29803e+06	1	8.41364	138.067	C8 H10 O2	Tyrosol
6-Hydroxyluteolin	Flavonoids	Flavones	247996	268657	1.72428e+06	711813	718772	824972	710404	952125	668103	1	2595169	2.83548e+06	249533	234830	237112	715568	689567	650639	7.13941	302.041	C15 H10 O7	6-Hydroxyluteolin
Morin	Flavonoids	Flavonols	247996	268657	1.72428e+06	711813	718772	824972	710404	952125	668103	1	2595169	2.83548e+06	249533	234830	237112	715568	689567	650639	7.13941	302.041	C15 H10 O7	Morin
Quercetin	Flavonoids	Flavonols	247996	268657	1.72428e+06	711813	718772	824972	710404	952125	668103	1	2595169	2.83548e+06	249533	234830	237112	715568	689567	650639	7.13941	302.041	C15 H10 O7	Quercetin
Avenanthramide 2f	Phenolic acids	Hydroxycinnamic acids	1.15618e+06	793494	836091	446620	449338	1	278733	281159	488282	700634	890324	703412	320805	1447864	302619	250914	248410	3.31962e+06	6.51176	329.089	C17 H15 N O6	Avenanthramide 2f
Hispidulin	Flavonoids	Flavones	139952	683805	169712	439438	434147	489914	1.21928e+06	1263813	1.23446e+06	1.35285e+06	1.38434e+06	1.52141e+06	471278	434742	462148	806849	830655	887626	11.2967	300.061	C16 H12 O6	Hispidulin
p-Coumaroyl malic acid	Phenolic acids	Hydroxycinnamic acids	2175957	1.0017e+06	1.65576e+06	711447	719953	824972	170445	926428	595279	1	1.99721e+06	2.79751e+06	369138	379162	391846	731851	701476	662804	7.24765	280.058	C13 H12 O7	p-Coumaroyl malic acid
5-Pentacosenylresorcinol	Other polyphenols	Alkylphenols	958980	1.15367e+06	1.44187e+06	1	1	1	1	1	1	1.86604e+06	2.10746e+06	2.11917e+06	1	1	1	746925	472462	716634	20.88	458.411	C31 H54 O2	5-Pentacosenylresorcinol
Sesamol	Lignans	Lignans	869313	966676	746845	245370	400461	306537	1	1	181286	2.40515e+06	1.63453e+06	1	509640	329067	663150	1	1.5367e+06	742308	4.22286	138.032	C7 H6 O3	Sesamol
Jaceosidin	Flavonoids	Flavones	1.15805e+06	653833	821762	510218	342359	320407	991693	530600	433502	203055	196971	225008	1.52272e+06	1.51028e+06	1.49075e+06	975272	861720	785793	4.915	330.079	C17 H14 O7	Jaceosidin
3,7-Dimethylquercetin	Flavonoids	Flavonols	1.15805e+06	653833	821762	510218	342359	320407	991693	530600	433502	203055	196971	225008	1.52272e+06	1.51028e+06	1.49075e+06	975272	861720	785793	4.915	330.079	C17 H14 O7	3,7-Dimethylquercetin
Sinapic acid	Phenolic acids	Hydroxycinnamic acids	1.8497e+06	463237	921150	1	220415	246200	718032	909844	1	1.44925e+06	1	1.46036e+06	2530134	313284	520622	450609	411346	422508	4.09	224.067	C11 H12 O5	Sinapic acid
Vitisin A	Flavonoids	Anthocyanins	206218	198138	138591	355506	300744	293144	234366	184204	1	1	252978	219594	2405022	2294271	2.3371e+06	1	1	1	4.06539	561.135	C26 H25 O14	Vitisin A
Pterostilbene	Stilbenes	Stilbenes	1	179071	222402	8518578	7.33622e+06	8.02181e+06	306147	3.19769e+06	1	1	2.32543e+06	2.26762e+06	232911	267627	243631	353921	1.28799e+06	528761	6.422	256.112	C16 H16 O3	Pterostilbene
Oleuropein	Other polyphenols	Tyrosols	302791	245669	146114	380436	157145	198629	1	1	1	1.4736e+06	1.15409e+06	911962	403508	446644	475976	1.00059e+06	815092	813748	4.114	540.189	C25 H32 O13	Oleuropein
Glycitin	Flavonoids	Isoflavonoids	1.4336e+06	1.14581e+06	1.09859e+06	1	329919	301261	182314	173808	497835	420089	1.97449e+06	1.97989e+06	737240	687698	1	609143	641812	357097	4.48625	446.125	C22 H22 O10	Glycitin
Protocatechuic aldehyde	Other polyphenols	Hydroxybenzaldehydes	869313	966676	746845	245370	400461	306537	1	1	181286	2.40515e+06	696573	503253	509640	329067	663150	1	1.5367e+06	742308	4.14467	138.032	C7 H6 O3	Protocatechuic aldehyde
2-Hydroxybenzoic acid	Phenolic acids	Hydroxybenzoic acids	869313	966676	746845	245370	400461	306537	1	1	181286	2.40515e+06	696573	503253	509640	329067	663150	1	1.5367e+06	742308	4.14467	138.032	C7 H6 O3	2-Hydroxybenzoic acid
3-Hydroxybenzoic acid	Phenolic acids	Hydroxybenzoic acids	869313	966676	746845	245370	400461	306537	1	1	181286	2.40515e+06	696573	503253	509640	329067	663150	1	1.5367e+06	742308	4.14467	138.032	C7 H6 O3	3-Hydroxybenzoic acid
4-Hydroxybenzoic acid	Phenolic acids	Hydroxybenzoic acids	869313	966676	746845	245370	400461	306537	1	1	181286	2.40515e+06	696573	503253	509640	329067	663150	1	1.5367e+06	742308	4.14467	138.032	C7 H6 O3	4-Hydroxybenzoic acid
Verbascoside	Phenolic acids	Hydroxycinnamic acids	379062	1	238095	127041	251534	293930	1	1	1	1.35405e+06	1261587	1.07179e+06	1.08283e+06	1154046	1.10291e+06	108222	200466	1	7.63615	624.213	C29 H36 O15	Verbascoside
Sesamin	Lignans	Lignans	2159442	1.90981e+06	1.50217e+06	1	79458.9	1	1	1	1	1.66198e+06	1.77764e+06	2.0864e+06	256536	1	466206	531305	539724	1	7.37545	354.11	C20 H18 O6	Sesamin
Quercetin 3-O-glucosyl-xyloside	Flavonoids	Flavonols	1	1	1	688076	866291	924209	819496	534608	953731	2.18065e+06	1.82186e+06	1.34206e+06	113059	108010	119402	525298	491275	586840	10.556	596.152	C26 H28 O16	Quercetin 3-O-glucosyl-xyloside
Petunidin 3-O-rhamnoside	Flavonoids	Anthocyanins	563519	338207	291294	118422	1	350456	1	1	1	890564	666954	860048	843087	1.02957e+06	1.08818e+06	725111	774023	397838	8.34214	447.131	C22 H23 O10	Petunidin 3-O-rhamnoside
Peonidin 3-O-rutinoside	Flavonoids	Anthocyanins	1.46169e+06	1.84383e+06	1.78717e+06	7.32361e+06	10285517	8926463	5810999	5802525	10698964	663425	591294	501908	380196	444322	431097	1.46365e+06	1.60309e+06	1.03534e+06	7.11667	609.177	C28 H33 O15	Peonidin 3-O-rutinoside
6''-O-Acetylglycitin	Flavonoids	Isoflavonoids	174490	189759	132327	476968	363259	420750	1	1	1	1.52992e+06	1.46652e+06	1342487	339304	1	193850	804031	784657	637192	4.66286	488.128	C24 H24 O11	6''-O-Acetylglycitin
Isopimpinellin	Other polyphenols	Furanocoumarins	385318	248350	266090	258113	1	1	1	473279	282064	189774	199075	1	1.72624e+06	831428	1	1.79521e+06	1.3615e+06	978245	2.92923	246.05	C13 H10 O5	Isopimpinellin
4-Vinylguaiacol	Other polyphenols	Alkylmethoxyphenols	967308	1.85661e+06	2031681	441233	414500	419713	317599	353611	572254	1.94692e+06	2.13764e+06	1	1	582585	1	788032	776756	798260	8.74867	150.067	C9 H10 O2	4-Vinylguaiacol
3-Methoxyacetophenone	Other polyphenols	Hydroxybenzoketones	967308	1.85661e+06	2031681	441233	414500	419713	317599	353611	572254	1.94692e+06	2.13764e+06	1	1	582585	1	788032	776756	798260	8.74867	150.067	C9 H10 O2	3-Methoxyacetophenone
Nobiletin	Flavonoids	Flavones	4664482	96770.1	465203	155223	3140306	250191	295233	303994	300786	1	161949	151900	1	4622559	1	1	993178	1.05228e+06	10.5321	402.142	C21 H22 O8	Nobiletin
3-Methoxysinensetin	Flavonoids	Flavonols	4664482	96770.1	465203	155223	3140306	250191	295233	303994	300786	1	161949	151900	1	4622559	1	1	993178	1.05228e+06	10.5321	402.142	C21 H22 O8	3-Methoxysinensetin
3,4-DHPEA-AC	Other polyphenols	Tyrosols	794794	391957	184513	1	1	1	1	1	1	1.81338e+06	1290925	1.67817e+06	508212	1	553556	312215	502012	230860	4.76	196.075	C10 H12 O4	3,4-DHPEA-AC
Homoveratric acid	Phenolic acids	Hydroxyphenylacetic acids	794794	391957	184513	1	1	1	1	1	1	1.81338e+06	1290925	1.67817e+06	508212	1	553556	312215	502012	230860	4.76	196.075	C10 H12 O4	Homoveratric acid
Ferulic acid 4-O-glucoside	Phenolic acids	Hydroxycinnamic acids	557890	427832	485203	243119	232480	238094	446057	1	498636	594347	709626	539363	647071	767910	757450	919077	978235	971402	5.11647	356.109	C16 H20 O9	Ferulic acid 4-O-glucoside
Feruloyl glucose	Phenolic acids	Hydroxycinnamic acids	557890	427832	485203	243119	232480	238094	446057	1	498636	594347	709626	539363	647071	767910	757450	919077	978235	971402	5.11647	356.109	C16 H20 O9	Feruloyl glucose
Episesamin	Lignans	Lignans	2159442	1.90981e+06	1.50217e+06	1	79458.9	1	1	1	1	1.66198e+06	1.77764e+06	1.54542e+06	256536	1	466206	531305	539724	1	7.37545	354.11	C20 H18 O6	Episesamin
3,4-Diferuloylquinic acid	Phenolic acids	Hydroxycinnamic acids	264963	358249	434935	4412421	6016818	6092358	3.78028e+06	4.59752e+06	5.78201e+06	944564	810108	983020	640315	860521	782441	530344	478156	461144	6.71333	544.153	C27 H28 O12	3,4-Diferuloylquinic acid
3,5-Diferuloylquinic acid	Phenolic acids	Hydroxycinnamic acids	264963	358249	434935	4412421	6016818	6092358	3.78028e+06	4.59752e+06	5.78201e+06	944564	810108	983020	640315	860521	782441	530344	478156	461144	6.71333	544.153	C27 H28 O12	3,5-Diferuloylquinic acid
Cyanidin 3-O-glucosyl-rutinoside	Flavonoids	Anthocyanins	1	1	1	1	982290	486292	746617	1.30878e+06	1.81424e+06	883634	879979	818293	974529	1.00321e+06	927764	290220	346105	345734	8.16929	757.21	C33 H41 O20	Cyanidin 3-O-glucosyl-rutinoside
Diosmin	Flavonoids	Flavones	1.49535e+06	1.83831e+06	1.79414e+06	103916	93455.6	8498925	5.48025e+06	5499741	10184392	890792	800778	691683	285213	299860	288068	1.14831e+06	1.23185e+06	810399	7.30611	608.169	C28 H32 O15	Diosmin
Neodiosmin	Flavonoids	Flavones	1.49535e+06	1.83831e+06	1.79414e+06	103916	93455.6	8498925	5.48025e+06	5499741	10184392	890792	800778	691683	285213	299860	288068	1.14831e+06	1.23185e+06	810399	7.30611	608.169	C28 H32 O15	Neodiosmin
3,4-Dihydroxyphenylglycol	Other polyphenols	Other polyphenols	20981944	812342	32325502	5569099	5.84485e+06	5753679	1.0669e+06	921578	6066229	691724	476956	1	998115	1.34266e+06	1.30614e+06	628289	475025	223597	4.89	170.057	C8 H10 O4	3,4-Dihydroxyphenylglycol
5-Pentadecylresorcinol	Other polyphenols	Alkylphenols	3.40481e+06	3.94793e+06	3.5376e+06	1	1	137663	518435	1	615246	506997	564246	1	1.59603e+06	301262	394854	795454	951432	1.0048e+06	11.8743	320.272	C21 H36 O2	5-Pentadecylresorcinol
Nepetin	Flavonoids	Flavones	1	406871	486883	131070	1	132374	350180	152901	365776	935180	1.09621e+06	1.04418e+06	147504	369825	370731	397357	498070	1.14223e+06	7.97875	316.056	C16 H12 O7	Nepetin
Isorhamnetin	Flavonoids	Flavonols	1	406871	486883	131070	1	132374	350180	152901	365776	935180	1.09621e+06	1.04418e+06	147504	369825	370731	397357	498070	1.14223e+06	7.97875	316.056	C16 H12 O7	Isorhamnetin
Rhamnetin	Flavonoids	Flavonols	1	406871	486883	131070	1	132374	350180	152901	365776	935180	1.09621e+06	1.04418e+06	147504	369825	370731	397357	498070	1.14223e+06	7.97875	316.056	C16 H12 O7	Rhamnetin
Pelargonidin	Flavonoids	Anthocyanins	3416517	3.62073e+06	3640073	1.35349e+06	1.38104e+06	1.54042e+06	7.0143e+06	7.26877e+06	7028795	396121	401940	459022	1.35939e+06	1.44646e+06	1.38218e+06	193118	94989.3	149342	9.54278	271.058	C15 H11 O5	Pelargonidin
1-Acetoxypinoresinol	Lignans	Lignans	492381	538431	1	1	1	1	183572	189635	182958	1.16657e+06	1.17081e+06	1.1921e+06	437350	445999	539008	1	413352	430496	12.2862	416.145	C22 H24 O8	1-Acetoxypinoresinol
Protocatechuic acid 4-O-glucoside	Phenolic acids	Hydroxybenzoic acids	1.98522e+06	2393719	2.68265e+06	455571	492579	367586	3.00179e+06	2.89116e+06	3.49452e+06	1.11027e+06	1.2013e+06	1053045	439072	807660	467668	179302	184642	216952	2.44611	316.078	C13 H16 O9	Protocatechuic acid 4-O-glucoside
Patuletin 3-O-glucosyl-(1-6)-[apiosyl(1-2)]-glucoside	Flavonoids	Flavonols	1	1	1	1	1	1	1	1	1	1.01617e+06	729622	654861	878973	612435	803625	375052	309783	247320	5.63333	788.194	C33 H40 O22	Patuletin 3-O-glucosyl-(1-6)-[apiosyl(1-2)]-glucoside
Pelargonidin 3-O-rutinoside	Flavonoids	Anthocyanins	3461126	1.76365e+06	4.94644e+06	43393036	54633128	48407928	49331864	48948384	80911000	589145	776382	575319	434088	462471	412609	828713	809998	711276	6.48667	579.167	C27 H31 O14	Pelargonidin 3-O-rutinoside
Vanillic acid	Phenolic acids	Hydroxybenzoic acids	484678	1	864721	1	1	1	293388	450209	418317	1641130	771514	1	1	870222	855234	669290	790292	1	4.34545	168.042	C8 H8 O4	Vanillic acid
3,4-Dihydroxyphenylacetic acid	Phenolic acids	Hydroxyphenylacetic acids	484678	1	864721	1	1	1	293388	450209	418317	1641130	771514	1	1	870222	855234	669290	790292	1	4.34545	168.042	C8 H8 O4	3,4-Dihydroxyphenylacetic acid
Isorhoifolin	Flavonoids	Flavones	3.59344e+06	1.79138e+06	5.03094e+06	41280584	52311600	47146188	46917632	46461232	77026056	690306	712575	642688	433511	462927	416725	808496	745929	682487	6.495	578.159	C27 H30 O14	Isorhoifolin
Rhoifolin	Flavonoids	Flavones	3.59344e+06	1.79138e+06	5.03094e+06	41280584	52311600	47146188	46917632	46461232	77026056	690306	712575	642688	433511	462927	416725	808496	745929	682487	6.495	578.159	C27 H30 O14	Rhoifolin
Syringaresinol	Lignans	Lignans	313332	214524	266489	1	140519	113063	1	1	1	419809	428953	397921	425791	539751	1	1.89198e+06	1.39404e+06	1	8.65083	418.162	C22 H26 O8	Syringaresinol
Cyclolariciresinol	Lignans	Lignans	1.72423e+06	2.2102e+06	1.47073e+06	691203	412820	330425	1.0227e+06	1.18078e+06	1.11003e+06	464009	657454	1.28246e+06	511139	507383	497410	348818	706876	374304	9.65833	360.16	C20 H24 O6	Cyclolariciresinol
Isolariciresinol	Lignans	Lignans	1.72423e+06	2.2102e+06	1.47073e+06	691203	412820	330425	1.0227e+06	1.18078e+06	1.11003e+06	464009	657454	1.28246e+06	511139	507383	497410	348818	706876	374304	9.65833	360.16	C20 H24 O6	Isolariciresinol
Lariciresinol	Lignans	Lignans	1.72423e+06	2.2102e+06	1.47073e+06	691203	412820	330425	1.0227e+06	1.18078e+06	1.11003e+06	464009	657454	1.28246e+06	511139	507383	497410	348818	706876	374304	9.65833	360.16	C20 H24 O6	Lariciresinol
6-Geranylnaringenin	Flavonoids	Flavanones	313737	285990	306732	1	1	1	471424	474458	529199	856073	1.34202e+06	1.38294e+06	1	537415	408189	268951	268288	285370	13.9214	408.194	C25 H28 O5	6-Geranylnaringenin
Phloridzin	Flavonoids	Dihydrochalcones	601890	438842	384534	882790	838655	789033	761816	708044	402056	531727	602997	1.71883e+06	1	2489590	1	1	1	1	4.40692	436.134	C21 H24 O10	Phloridzin
(+)-Gallocatechin 3-O-gallate	Flavonoids	Flavanols	283424	189047	90340.5	1	1	1	1	1	1	442548	347144	364535	718099	714880	718016	645134	643867	696432	10.035	458.084	C22 H18 O11	(+)-Gallocatechin 3-O-gallate
(-)-Epigallocatechin 3-O-gallate	Flavonoids	Flavanols	283424	189047	90340.5	1	1	1	1	1	1	442548	347144	364535	718099	714880	718016	645134	643867	696432	10.035	458.084	C22 H18 O11	(-)-Epigallocatechin 3-O-gallate
Isorhamnetin 3-O-galactoside	Flavonoids	Flavonols	444163	151561	167978	103285	133880	146163	1	1	1	148276	141164	119786	1.19604e+06	1090928	1.3249e+06	517560	391957	286335	5.692	478.109	C22 H22 O12	Isorhamnetin 3-O-galactoside
Isorhamnetin 3-O-glucoside	Flavonoids	Flavonols	444163	151561	167978	103285	133880	146163	1	1	1	148276	141164	119786	1.19604e+06	1090928	1.3249e+06	517560	391957	286335	5.692	478.109	C22 H22 O12	Isorhamnetin 3-O-glucoside
Isorhamnetin 4'-O-glucoside	Flavonoids	Flavonols	444163	151561	167978	103285	133880	146163	1	1	1	148276	141164	119786	1.19604e+06	1090928	1.3249e+06	517560	391957	286335	5.692	478.109	C22 H22 O12	Isorhamnetin 4'-O-glucoside
Isorhamnetin 7-O-rhamnoside	Flavonoids	Flavonols	444163	151561	167978	103285	133880	146163	1	1	1	148276	141164	119786	1.19604e+06	1090928	1.3249e+06	517560	391957	286335	5.692	478.109	C22 H22 O12	Isorhamnetin 7-O-rhamnoside
Kaempferol 3-O-glucosyl-rhamnosyl-galactoside	Flavonoids	Flavonols	1	1	1	1	674957	597119	1	1.23411e+06	1.72834e+06	163045	145989	126073	2.1838e+06	2.17395e+06	1	81449.9	130905	151263	10.6383	756.23	C33 H40 O20	Kaempferol 3-O-glucosyl-rhamnosyl-galactoside
Kaempferol 3-O-glucosyl-rhamnosyl-glucoside	Flavonoids	Flavonols	1	1	1	1	674957	597119	1	1.23411e+06	1.72834e+06	163045	145989	126073	2.1838e+06	2.17395e+06	1	81449.9	130905	151263	10.6383	756.23	C33 H40 O20	Kaempferol 3-O-glucosyl-rhamnosyl-glucoside
Quercetin 3-O-rhamnosyl-rhamnosyl-glucoside	Flavonoids	Flavonols	1	1	1	1	674957	597119	1	1.23411e+06	1.72834e+06	163045	145989	126073	2.1838e+06	2.17395e+06	1	81449.9	130905	151263	10.6383	756.23	C33 H40 O20	Quercetin 3-O-rhamnosyl-rhamnosyl-glucoside
Delphinidin 3-O-rutinoside	Flavonoids	Anthocyanins	356020	513817	607979	7.24942e+06	8619242	7550625	5760054	9142777	11536094	189937	375323	1	372096	451295	409560	1.21974e+06	1.28669e+06	726175	5.23235	611.156	C27 H31 O16	Delphinidin 3-O-rutinoside
Cyanidin 3,5-O-diglucoside	Flavonoids	Anthocyanins	356020	513817	607979	7.24942e+06	8171038	7550625	5760054	9142777	11536094	189937	375323	1	372096	451295	409560	1.21974e+06	1.28669e+06	726175	5.23235	611.156	C27 H31 O16	Cyanidin 3,5-O-diglucoside
Cyanidin 3-O-sophoroside	Flavonoids	Anthocyanins	356020	513817	607979	7.24942e+06	8171038	7550625	5760054	9142777	11536094	189937	375323	1	372096	451295	409560	1.21974e+06	1.28669e+06	726175	5.23235	611.156	C27 H31 O16	Cyanidin 3-O-sophoroside
Malvidin 3-O-(6''-acetyl-galactoside)	Flavonoids	Anthocyanins	172824	126980	116314	2009238	2.19025e+06	2.30412e+06	402249	527462	467323	328379	200447	152839	1.02123e+06	1.11111e+06	1.02381e+06	483037	533775	172538	12.1211	535.146	C25 H27 O13	Malvidin 3-O-(6''-acetyl-galactoside)
Malvidin 3-O-(6''-acetyl-glucoside)	Flavonoids	Anthocyanins	172824	126980	116314	2009238	2.19025e+06	2.30412e+06	402249	527462	467323	328379	200447	152839	1.02123e+06	1.11111e+06	1.02381e+06	483037	533775	172538	12.1211	535.146	C25 H27 O13	Malvidin 3-O-(6''-acetyl-glucoside)
Eriodictyol	Flavonoids	Flavanones	301694	313235	310897	1	1	165627	1	322189	293714	873394	862470	1.03185e+06	201366	192906	202635	775300	794100	1	10.35	288.062	C15 H12 O6	Eriodictyol
Isorhamnetin 3-O-glucoside 7-O-rhamnoside	Flavonoids	Flavonols	272478	347344	392569	380792	587529	567275	316209	321535	450890	108086	102199	111094	324954	397561	373742	1289707	1.29688e+06	847339	5.69	624.165	C28 H32 O16	Isorhamnetin 3-O-glucoside 7-O-rhamnoside
[6]-Gingerol	Other polyphenols	Hydroxyphenylpropenes	258713	1	137291	576295	583389	573150	583037	552522	487099	1	389159	582749	624730	700721	754594	809582	980440	1	16.8973	300.23	C17 H32 O4	[6]-Gingerol
Esculetin	Other polyphenols	Hydroxycoumarins	265453	306517	235918	129742	102255	108217	341765	684461	341407	1.34442e+06	1.55745e+06	1.3599e+06	1	93902.7	1	172631	118275	189835	5.82437	178.025	C9 H6 O4	Esculetin
Psoralen	Other polyphenols	Furanocoumarins	2.18521e+06	1.70977e+06	1.54463e+06	1	1	98107.4	1	1	1	172413	177727	1	1.49811e+06	1.51669e+06	1462838	1	1	1	8.61111	186.03	C11 H6 O3	Psoralen
3-Caffeoylquinic acid	Phenolic acids	Hydroxycinnamic acids	401621	392737	374002	1.43319e+06	1	1.20314e+06	202236	1	340780	1	952230	338657	874936	981728	1	355421	591972	726074	6.82	354.092	C16 H18 O9	3-Caffeoylquinic acid
4-Caffeoylquinic acid	Phenolic acids	Hydroxycinnamic acids	401621	392737	374002	1.43319e+06	1	1.20314e+06	202236	1	340780	1	952230	338657	874936	981728	1	355421	591972	726074	6.82	354.092	C16 H18 O9	4-Caffeoylquinic acid
5-Caffeoylquinic acid	Phenolic acids	Hydroxycinnamic acids	401621	392737	374002	1.43319e+06	1	1.20314e+06	202236	1	340780	1	952230	338657	874936	981728	1	355421	591972	726074	6.82	354.092	C16 H18 O9	5-Caffeoylquinic acid
3,4-DHPEA-EA	Other polyphenols	Tyrosols	118707	160278	145907	821899	755965	672664	2.21546e+06	2.20382e+06	2.08633e+06	1.77642e+06	1.59517e+06	1	311547	1	309499	392552	419628	1	9.192	378.126	C19 H22 O8	3,4-DHPEA-EA
Oleuropein-aglycone	Other polyphenols	Tyrosols	118707	160278	145907	821899	755965	672664	2.21546e+06	2.20382e+06	2.08633e+06	1.77642e+06	1.59517e+06	1	311547	1	309499	392552	419628	1	9.192	378.126	C19 H22 O8	Oleuropein-aglycone
Stigmastanol ferulate	Phenolic acids	Hydroxycinnamic acids	3.18971e+06	4199355	1	363573	476743	581894	629854	643716	777427	1.25538e+06	1	884714	1	1	1	2614791	1	1	19.8227	592.451	C39 H60 O4	Stigmastanol ferulate
Kaempferol 3,7-O-diglucoside	Flavonoids	Flavonols	356020	513817	607979	6.63238e+06	1	7252433	5.49897e+06	8751204	11082684	89302.4	374276	160684	298626	363138	325034	1.17363e+06	1.2395e+06	660651	6.49118	610.148	C27 H30 O16	Kaempferol 3,7-O-diglucoside
Kaempferol 3-O-sophoroside	Flavonoids	Flavonols	356020	513817	607979	6.63238e+06	1	7252433	5.49897e+06	8751204	11082684	89302.4	374276	160684	298626	363138	325034	1.17363e+06	1.2395e+06	660651	6.49118	610.148	C27 H30 O16	Kaempferol 3-O-sophoroside
Quercetin 3-O-galactoside 7-O-rhamnoside	Flavonoids	Flavonols	356020	513817	607979	6.63238e+06	1	7252433	5.49897e+06	8751204	11082684	89302.4	374276	160684	298626	363138	325034	1.17363e+06	1.2395e+06	660651	6.49118	610.148	C27 H30 O16	Quercetin 3-O-galactoside 7-O-rhamnoside
Quercetin 3-O-rhamnosyl-galactoside	Flavonoids	Flavonols	356020	513817	607979	6.63238e+06	1	7252433	5.49897e+06	8751204	11082684	89302.4	374276	160684	298626	363138	325034	1.17363e+06	1.2395e+06	660651	6.49118	610.148	C27 H30 O16	Quercetin 3-O-rhamnosyl-galactoside
Quercetin 3-O-rutinoside	Flavonoids	Flavonols	356020	513817	607979	6.63238e+06	1	7252433	5.49897e+06	8751204	11082684	89302.4	374276	160684	298626	363138	325034	1.17363e+06	1.2395e+06	660651	6.49118	610.148	C27 H30 O16	Quercetin 3-O-rutinoside
Cyanidin	Flavonoids	Anthocyanins	2.35114e+06	1.34001e+06	1	20234218	20711312	23694954	14747947	18304822	15712432	723932	1	898966	128914	150576	1	841172	897793	852362	8.996	287.054	C15 H11 O6	Cyanidin
Sinapine	Phenolic acids	Hydroxycinnamic acids	6.68607e+06	6.4887e+06	955322	1	1	973588	4.48427e+06	4711344	4.84199e+06	1	2.06362e+06	1	1	1	1	837585	770271	816980	8.06455	310.17	C16 H24 N O5	Sinapine
Avenanthramide 2c	Phenolic acids	Hydroxycinnamic acids	985409	2.19432e+06	3.36921e+06	1	1	1	1.7639e+06	1806628	2.02745e+06	176834	1	167121	444845	473469	398494	1.02627e+06	857292	939500	2.29	315.072	C16 H13 N O6	Avenanthramide 2c
Avenanthramide K	Phenolic acids	Hydroxycinnamic acids	985409	2.19432e+06	3.36921e+06	1	1	1	1.7639e+06	1806628	2.02745e+06	176834	1	167121	444845	473469	398494	1.02627e+06	857292	939500	2.29	315.072	C16 H13 N O6	Avenanthramide K
24-Methylcholesterol ferulate	Phenolic acids	Hydroxycinnamic acids	630904	919857	1427191	1.15276e+06	1.2787e+06	1	1	1	1	886826	480696	536327	609332	612934	607307	1	398978	308236	19.8562	576.416	C38 H56 O4	24-Methylcholesterol ferulate
24-Methylenecholestanol ferulate	Phenolic acids	Hydroxycinnamic acids	630904	919857	1427191	1.15276e+06	1.2787e+06	1	1	1	1	886826	480696	536327	609332	612934	607307	1	398978	308236	19.8562	576.416	C38 H56 O4	24-Methylenecholestanol ferulate
24-Methyllathosterol ferulate	Phenolic acids	Hydroxycinnamic acids	630904	919857	1427191	1.15276e+06	1.2787e+06	1	1	1	1	886826	480696	536327	609332	612934	607307	1	398978	308236	19.8562	576.416	C38 H56 O4	24-Methyllathosterol ferulate
Petunidin 3-O-(6''-p-coumaroyl-glucoside)	Flavonoids	Anthocyanins	1	1	1	398787	621816	1	134687	165726	450890	463155	597728	558383	184840	259850	268722	133074	1.70114e+06	98041	4.64357	625.17	C31 H29 O14	Petunidin 3-O-(6''-p-coumaroyl-glucoside)
Pinotin A	Flavonoids	Anthocyanins	1	1	1	398787	621816	1	134687	165726	450890	463155	597728	558383	184840	259850	268722	133074	1.70114e+06	98041	4.64357	625.17	C31 H29 O14	Pinotin A
p-Coumaroyl tartaric acid	Phenolic acids	Hydroxycinnamic acids	394973	392581	392186	1	1	453459	1	1.07812e+06	324762	243374	243976	231676	350314	271210	247742	992964	796244	841848	3.47267	296.055	C13 H12 O8	p-Coumaroyl tartaric acid
Naringenin 7-O-glucoside	Flavonoids	Flavanones	1.41166e+06	916291	1.3275e+06	347856	286444	292419	493257	785233	1.40983e+06	1	1.5719e+06	1	1.15067e+06	123630	1.13312e+06	1	238611	1	4.21071	434.122	C21 H22 O10	Naringenin 7-O-glucoside
Naringin 4'-O-glucoside	Flavonoids	Flavanones	1.41166e+06	916291	1.3275e+06	347856	286444	292419	493257	785233	1.40983e+06	1	1.5719e+06	1	1.15067e+06	123630	1.13312e+06	1	238611	1	4.21071	434.122	C21 H22 O10	Naringin 4'-O-glucoside
Spinacetin 3-O-glucosyl-(1-6)-[apiosyl(1-2)]-glucoside	Flavonoids	Flavonols	1	1	1	1	1	1	1	1	1	831169	649616	482184	245959	239291	237480	343881	526862	614853	12.85	802.221	C34 H42 O22	Spinacetin 3-O-glucosyl-(1-6)-[apiosyl(1-2)]-glucoside
Luteolin	Flavonoids	Flavones	2.06835e+06	1	1	17429368	17834208	20416066	12708109	17951786	13541458	702048	1	808396	128914	150576	1	780213	811968	785053	8.80643	286.046	C15 H10 O6	Luteolin
Scutellarein	Flavonoids	Flavones	2.06835e+06	1	1	17429368	17834208	20416066	12708109	17951786	13541458	702048	1	808396	128914	150576	1	780213	811968	785053	8.80643	286.046	C15 H10 O6	Scutellarein
Kaempferol	Flavonoids	Flavonols	2.06835e+06	1	1	17429368	17834208	20416066	12708109	17951786	13541458	702048	1	808396	128914	150576	1	780213	811968	785053	8.80643	286.046	C15 H10 O6	Kaempferol
Geraldone	Flavonoids	Flavones	1	1.19024e+06	1.18843e+06	862767	904544	812483	1	4398779	3.63028e+06	1	422811	396292	692751	682006	688322	315732	353588	568554	8.59467	284.067	C16 H12 O5	Geraldone
Methylgalangin	Flavonoids	Flavonols	1	1.19024e+06	1.18843e+06	862767	904544	812483	1	4398779	3.63028e+06	1	422811	396292	692751	682006	688322	315732	353588	568554	8.59467	284.067	C16 H12 O5	Methylgalangin
Biochanin A	Flavonoids	Isoflavonoids	1	1.19024e+06	1.18843e+06	685245	904544	812483	1	4398779	3.63028e+06	1	422811	396292	692751	682006	688322	315732	353588	568554	8.59467	284.067	C16 H12 O5	Biochanin A
Glycitein	Flavonoids	Isoflavonoids	1	1.19024e+06	1.18843e+06	685245	904544	812483	1	4398779	3.63028e+06	1	422811	396292	692751	682006	688322	315732	353588	568554	8.59467	284.067	C16 H12 O5	Glycitein
Ligstroside	Other polyphenols	Tyrosols	108577	122348	163162	1.45805e+06	1.35982e+06	977900	347822	148029	244518	608082	406395	357423	138460	1	1	1.1965e+06	839094	558130	6.545	524.193	C25 H32 O12	Ligstroside
5-Tricosylresorcinol	Other polyphenols	Alkylphenols	145896	332040	254379	1	1	1	1	1	1	1200877	1.28165e+06	642267	1	1	1	1	475333	450832	22.62	432.396	C29 H52 O2	5-Tricosylresorcinol
5-5'-Dehydrodiferulic acid	Phenolic acids	Hydroxycinnamic acids	846264	596505	1.41181e+06	1139033	479251	1	1223991	479276	508768	493242	442227	548282	327407	330619	316721	493507	443274	524693	8.84412	386.101	C20 H18 O8	5-5'-Dehydrodiferulic acid
5-8'-Benzofuran dehydrodiferulic acid	Phenolic acids	Hydroxycinnamic acids	846264	596505	1.41181e+06	1139033	479251	1	1223991	479276	508768	493242	442227	548282	327407	330619	316721	493507	443274	524693	8.84412	386.101	C20 H18 O8	5-8'-Benzofuran dehydrodiferulic acid
5-8'-Dehydrodiferulic acid	Phenolic acids	Hydroxycinnamic acids	846264	596505	1.41181e+06	1139033	479251	1	1223991	479276	508768	493242	442227	548282	327407	330619	316721	493507	443274	524693	8.84412	386.101	C20 H18 O8	5-8'-Dehydrodiferulic acid
8-O-4'-Dehydrodiferulic acid	Phenolic acids	Hydroxycinnamic acids	846264	596505	1.41181e+06	1139033	479251	1	1223991	479276	508768	493242	442227	548282	327407	330619	316721	493507	443274	524693	8.84412	386.101	C20 H18 O8	8-O-4'-Dehydrodiferulic acid
p-Coumaroyl glycolic acid	Phenolic acids	Hydroxycinnamic acids	1.68718e+06	1.30183e+06	1.03421e+06	1	1	1	1	1	1	766853	718888	907823	130804	1	143533	381050	428778	428297	7.88	222.051	C11 H10 O5	p-Coumaroyl glycolic acid
Hesperidin	Flavonoids	Flavanones	387448	497356	1	2.12061e+06	2.99561e+06	2.59779e+06	221423	120136	202505	1	345244	261450	317036	197076	277111	893720	766735	835341	6.44313	610.179	C28 H34 O15	Hesperidin
Neohesperidin	Flavonoids	Flavanones	387448	497356	1	2.12061e+06	2.99561e+06	2.59779e+06	221423	120136	202505	1	345244	261450	317036	197076	277111	893720	766735	835341	6.44313	610.179	C28 H34 O15	Neohesperidin
4-Ethylphenol	Other polyphenols	Alkylphenols	1.73631e+06	1	1.99772e+06	1	154101	201674	153642	182987	136828	1	1.28527e+06	1.71528e+06	1	298177	1	299019	1	265683	8.165	122.074	C8 H10 O	4-Ethylphenol
4-Hydroxybenzoic acid 4-O-glucoside	Phenolic acids	Hydroxybenzoic acids	1	1.3017e+06	2.1559e+06	132192	367576	151993	753373	402618	107398	776498	826864	1	349633	1	332039	242410	218013	1.10047e+06	4.08467	300.086	C13 H16 O8	4-Hydroxybenzoic acid 4-O-glucoside
5,6-Dihydroxy-7,8,3',4'-tetramethoxyflavone	Flavonoids	Flavones	1	225450	314629	794431	307877	317683	1.96863e+06	1.78161e+06	850405	590637	314951	682645	410303	415262	420267	503097	1	466454	9.3025	374.099	C19 H18 O8	5,6-Dihydroxy-7,8,3',4'-tetramethoxyflavone
Pelargonidin 3-O-(6''-succinyl-glucoside)	Flavonoids	Anthocyanins	202992	193064	118286	1	1	1	1	1	1	1	1	1	1.00637e+06	1.13786e+06	1.05308e+06	574240	1	1	1.79	533.118	C25 H25 O13	Pelargonidin 3-O-(6''-succinyl-glucoside)
5-O-Galloylquinic acid	Phenolic acids	Hydroxybenzoic acids	2.09178e+06	1	1.86775e+06	459495	388601	1	151420	429345	371188	783866	1	745430	190218	448954	222952	768905	290013	294998	4.44	344.077	C14 H16 O10	5-O-Galloylquinic acid
Gallic acid	Phenolic acids	Hydroxybenzoic acids	727183	590763	1	388714	427189	133537	1	1	1	1	983764	1	1	1	1	1.13077e+06	870820	753957	1.93	170.018	C7 H6 O5	Gallic acid
Arbutin	Other polyphenols	Other polyphenols	1	1.45573e+06	1.80857e+06	2.20429e+06	1.84773e+06	1.70829e+06	810965	1	1024264	1	725362	1	359320	604604	529765	457876	595109	459694	5.985	272.09	C12 H16 O7	Arbutin
Kaempferide	Flavonoids	Flavonols	210234	203415	289861	2286288	578699	608599	597664	254976	1	99237.5	100776	122533	820993	1.26949e+06	1.15555e+06	117458	1	1	8.578	299.056	C16 H11 O6	Kaempferide
Carnosol	Other polyphenols	Phenolic terpenes	1	1	409737	1	1	1	8420183	8719252	10907305	1	1	1	1	1	1	1	1	3637362	6.25	330.184	C20 H26 O4	Carnosol
6''-O-Malonyldaidzin	Flavonoids	Isoflavonoids	170515	119195	1	1	1	1	1	1	1	579835	546302	510570	1	1.12997e+06	1	315184	312867	221792	6.00667	502.108	C24 H22 O12	6''-O-Malonyldaidzin
Petunidin 3,5-O-diglucoside	Flavonoids	Anthocyanins	1	1	1	1.98985e+06	2.64743e+06	3.01334e+06	822273	116209	1	163089	150050	144714	238674	206662	274687	800011	819728	763625	5.79071	641.168	C28 H33 O17	Petunidin 3,5-O-diglucoside
Delphinidin 3-O-feruloyl-glucoside	Flavonoids	Anthocyanins	1	1	1	1	1	1	1	116209	155225	163089	150050	144714	238674	206662	274687	800011	819728	758190	5.17546	641.167	C31 H29 O15	Delphinidin 3-O-feruloyl-glucoside
Dihydroquercetin 3-O-rhamnoside	Flavonoids	Dihydroflavonols	729986	590766	1	2.87865e+06	127154	2.65807e+06	161608	5483561	5.86302e+06	228097	174459	208532	238941	320973	325002	915054	236452	906261	5.04235	450.108	C21 H22 O11	Dihydroquercetin 3-O-rhamnoside
Eriodictyol 7-O-glucoside	Flavonoids	Flavanones	729986	590766	1	2.87865e+06	127154	2.65807e+06	161608	5483561	5.86302e+06	228097	174459	208532	238941	320973	325002	915054	236452	906261	5.04235	450.108	C21 H22 O11	Eriodictyol 7-O-glucoside
Spinacetin 3-O-glucosyl-(1-6)-glucoside	Flavonoids	Flavonols	1	1	1	1	1	1	1	1	1	1	1	1	949439	752825	922054	192909	323803	351657	1.38	670.187	C29 H34 O18	Spinacetin 3-O-glucosyl-(1-6)-glucoside
Caffeoyl aspartic acid	Phenolic acids	Hydroxycinnamic acids	1	388634	1	648884	554204	1	1	1	3.66442e+06	268761	1	285844	463999	497397	479539	1	704181	778966	2.28182	295.062	C13 H13 N O7	Caffeoyl aspartic acid
Cyanidin 3-O-(6''-caffeoyl-glucoside)	Flavonoids	Anthocyanins	221805	344832	257508	7.24942e+06	8619242	7550563	5760054	9142777	11536094	89677.7	123958	160986	293161	346308	307537	689495	693107	667531	8.94333	611.154	C30 H27 O14	Cyanidin 3-O-(6''-caffeoyl-glucoside)
Delphinidin 3-O-(6''-p-coumaroyl-glucoside)	Flavonoids	Anthocyanins	221805	344832	257508	7.24942e+06	8619242	7550563	5760054	9142777	11536094	89677.7	123958	160986	293161	346308	307537	689495	693107	667531	8.94333	611.154	C30 H27 O14	Delphinidin 3-O-(6''-p-coumaroyl-glucoside)
Feruloyl tartaric acid	Phenolic acids	Hydroxycinnamic acids	267652	270902	295779	453510	259294	424796	302865	487540	287257	316889	329022	293566	484818	1	399621	526525	487412	519287	8.00235	326.067	C14 H14 O9	Feruloyl tartaric acid
Procyanidin dimer B1	Flavonoids	Flavanols	501792	612686	640376	12066945	9818786	9549041	1.27237e+06	1	1.27335e+06	764642	699286	893536	218224	182147	194685	143599	137547	99080.3	8.19882	578.153	C30 H26 O12	Procyanidin dimer B1
Procyanidin dimer B2	Flavonoids	Flavanols	501792	612686	640376	12066945	9818786	9549041	1.27237e+06	1	1.27335e+06	764642	699286	893536	218224	182147	194685	143599	137547	99080.3	8.19882	578.153	C30 H26 O12	Procyanidin dimer B2
Procyanidin dimer B3	Flavonoids	Flavanols	501792	612686	640376	12066945	9818786	9549041	1.27237e+06	1	1.27335e+06	764642	699286	893536	218224	182147	194685	143599	137547	99080.3	8.19882	578.153	C30 H26 O12	Procyanidin dimer B3
Procyanidin dimer B4	Flavonoids	Flavanols	501792	612686	640376	12066945	9818786	9549041	1.27237e+06	1	1.27335e+06	764642	699286	893536	218224	182147	194685	143599	137547	99080.3	8.19882	578.153	C30 H26 O12	Procyanidin dimer B4
Procyanidin dimer B5	Flavonoids	Flavanols	501792	612686	640376	12066945	9818786	9549041	1.27237e+06	1	1.27335e+06	764642	699286	893536	218224	182147	194685	143599	137547	99080.3	8.19882	578.153	C30 H26 O12	Procyanidin dimer B5
Procyanidin dimer B7	Flavonoids	Flavanols	501792	612686	640376	12066945	9818786	9549041	1.27237e+06	1	1.27335e+06	764642	699286	893536	218224	182147	194685	143599	137547	99080.3	8.19882	578.153	C30 H26 O12	Procyanidin dimer B7
Delphinidin 3-O-galactoside	Flavonoids	Anthocyanins	221391	197566	179686	194018	222811	229328	1	1	327394	436523	360520	327183	217037	237858	215529	455411	489966	501099	7.01437	465.1	C21 H21 O12	Delphinidin 3-O-galactoside
Delphinidin 3-O-glucoside	Flavonoids	Anthocyanins	221391	197566	179686	194018	222811	229328	1	1	327394	436523	360520	327183	217037	237858	215529	455411	489966	501099	7.01437	465.1	C21 H21 O12	Delphinidin 3-O-glucoside
(+)-Gallocatechin	Flavonoids	Flavanols	2215519	1.90149e+06	1	1214270	799251	791454	1	1.58279e+06	1.21415e+06	104000	1	221283	357819	358784	1	1	1094011	1.06414e+06	6.7	306.074	C15 H14 O7	(+)-Gallocatechin
(-)-Epigallocatechin	Flavonoids	Flavanols	2215519	1.90149e+06	1	1214270	799251	791454	1	1.58279e+06	1.21415e+06	104000	1	221283	357819	358784	1	1	1094011	1.06414e+06	6.7	306.074	C15 H14 O7	(-)-Epigallocatechin
Daidzin	Flavonoids	Isoflavonoids	1.38681e+06	327378	1134961	1.05299e+06	872590	867893	476476	546144	532268	398648	1	515930	654800	873640	698218	1	1	1	4.70929	416.108	C21 H20 O9	Daidzin
Carnosic acid	Other polyphenols	Phenolic terpenes	2999611	8605774	1	2.53686e+06	1.05613e+06	2.65392e+06	2.27181e+06	1.89679e+06	2073080	1	1	1	1.06881e+06	1.00528e+06	1.06281e+06	1	1	1	10.6936	332.196	C20 H28 O4	Carnosic acid
Myricetin 3-O-rutinoside	Flavonoids	Flavonols	1	91420.7	106758	113391	123844	92786.5	591461	1.02453e+06	611498	1	148119	147483	114214	102739	342074	769587	732238	774390	5.16375	626.144	C27 H30 O17	Myricetin 3-O-rutinoside
Quercetin 3,4'-O-diglucoside	Flavonoids	Flavonols	1	91420.7	106758	113391	123844	92786.5	591461	1.02453e+06	611498	1	148119	147483	114214	102739	342074	769587	732238	774390	5.16375	626.144	C27 H30 O17	Quercetin 3,4'-O-diglucoside
Quercetin 3-O-sophoroside	Flavonoids	Flavonols	1	91420.7	106758	113391	123844	92786.5	591461	1.02453e+06	611498	1	148119	147483	114214	102739	342074	769587	732238	774390	5.16375	626.144	C27 H30 O17	Quercetin 3-O-sophoroside
(+)-Catechin 3-O-gallate	Flavonoids	Flavanols	547196	133879	165408	533191	407413	368304	1	1	1	1.04598e+06	174903	1187338	94646.8	95000	100380	123665	121598	117756	9.35	442.09	C22 H18 O10	(+)-Catechin 3-O-gallate
(-)-Epicatechin 3-O-gallate	Flavonoids	Flavanols	547196	133879	165408	533191	407413	368304	1	1	1	1.04598e+06	174903	1187338	94646.8	95000	100380	123665	121598	117756	9.35	442.09	C22 H18 O10	(-)-Epicatechin 3-O-gallate
1-Sinapoyl-2-feruloylgentiobiose	Phenolic acids	Hydroxycinnamic acids	1	126936	100272	519833	1.16612e+06	5444573	8630304	3.92117e+06	6984049	270527	650210	572814	441248	436917	1	1	405759	248259	10.8593	724.209	C33 H40 O18	1-Sinapoyl-2-feruloylgentiobiose
Pinocembrin	Flavonoids	Flavanones	630682	2.07173e+06	373599	1.12657e+06	735619	879930	2.02616e+06	1983727	1642835	775400	892797	1	267226	873797	1	104213	96067.6	1	3.09733	256.075	C15 H12 O4	Pinocembrin
7,4'-Dihydroxyflavone	Flavonoids	Flavones	3.65656e+06	2.55916e+06	2.64562e+06	300854	204366	256061	1	1	1	1.01186e+06	273835	924685	214305	214040	199243	1	1	1	2.12667	254.063	C15 H10 O4	7,4'-Dihydroxyflavone
Chrysin	Flavonoids	Flavones	3.65656e+06	2.55916e+06	2.64562e+06	300854	204366	256061	1	1	1	1.01186e+06	273835	924685	214305	214040	199243	1	1	1	2.12667	254.063	C15 H10 O4	Chrysin
Quercetin 7,4'-O-diglucoside	Flavonoids	Flavonols	1	91420.7	106758	113391	123844	92786.5	591461	1.02453e+06	611498	1	1	1	114214	102739	342074	769587	732238	774390	5.09429	626.144	C27 H30 O17	Quercetin 7,4'-O-diglucoside
Myricetin 3-O-rhamnoside	Flavonoids	Flavonols	1	448360	495687	172888	204334	199505	732622	759423	298977	369484	320404	288242	211927	214672	197821	400573	409080	415871	6.67176	464.093	C21 H20 O12	Myricetin 3-O-rhamnoside
Quercetin 3-O-galactoside	Flavonoids	Flavonols	1	448360	495687	172888	204334	199505	732622	759423	298977	369484	320404	288242	211927	214672	197821	400573	409080	415871	6.67176	464.093	C21 H20 O12	Quercetin 3-O-galactoside
Quercetin 3-O-glucoside	Flavonoids	Flavonols	1	448360	495687	172888	204334	199505	732622	759423	298977	369484	320404	288242	211927	214672	197821	400573	409080	415871	6.67176	464.093	C21 H20 O12	Quercetin 3-O-glucoside
Quercetin 4'-O-glucoside	Flavonoids	Flavonols	1	448360	495687	172888	204334	199505	732622	759423	298977	369484	320404	288242	206308	214672	197821	400573	409080	415871	6.67176	464.093	C21 H20 O12	Quercetin 4'-O-glucoside
Prodelphinidin dimer B3	Flavonoids	Flavanols	247358	380579	270100	1.90692e+06	2.38361e+06	2352580	2.77804e+06	2.25678e+06	1	237202	195524	160986	293161	346504	307537	633829	642207	1	9.335	610.149	C30 H26 O14	Prodelphinidin dimer B3
Myricetin 3-O-arabinoside	Flavonoids	Flavonols	175462	1	1	238784	169107	222639	1	1	1	218195	1	1	453624	464275	460013	390791	370993	424778	8.91364	450.082	C20 H18 O12	Myricetin 3-O-arabinoside
1-Sinapoyl-2,2'-diferuloylgentiobiose	Phenolic acids	Hydroxycinnamic acids	1	1	1	1	1	1	1	1	1	1	1	1	382649	455686	221718	596970	533791	559159	4.00333	900.287	C43 H48 O21	1-Sinapoyl-2,2'-diferuloylgentiobiose
Gallic aldehyde	Other polyphenols	Hydroxybenzaldehydes	1.35043e+06	1.64965e+06	2.53163e+06	1.09725e+06	542447	706789	776251	583917	418178	275713	195263	238440	298489	301105	422244	303944	317417	358566	3.565	154.026	C7 H6 O4	Gallic aldehyde
2,3-Dihydroxybenzoic acid	Phenolic acids	Hydroxybenzoic acids	1.35043e+06	1.64965e+06	2.53163e+06	1.09725e+06	542447	706789	776251	583917	418178	275713	195263	238440	298489	301105	422244	303944	317417	358566	3.565	154.026	C7 H6 O4	2,3-Dihydroxybenzoic acid
2,4-Dihydroxybenzoic acid	Phenolic acids	Hydroxybenzoic acids	1.35043e+06	1.64965e+06	2.53163e+06	1.09725e+06	542447	706789	776251	583917	418178	275713	195263	238440	298489	301105	422244	303944	317417	358566	3.565	154.026	C7 H6 O4	2,4-Dihydroxybenzoic acid
2,6-Dihydroxybenzoic acid	Phenolic acids	Hydroxybenzoic acids	1.35043e+06	1.64965e+06	2.53163e+06	1.09725e+06	542447	706789	776251	583917	418178	275713	195263	238440	298489	301105	422244	303944	317417	358566	3.565	154.026	C7 H6 O4	2,6-Dihydroxybenzoic acid
3,5-Dihydroxybenzoic acid	Phenolic acids	Hydroxybenzoic acids	1.35043e+06	1.64965e+06	2.53163e+06	1.09725e+06	542447	706789	776251	583917	418178	275713	195263	238440	298489	301105	422244	303944	317417	358566	3.565	154.026	C7 H6 O4	3,5-Dihydroxybenzoic acid
Gentisic acid	Phenolic acids	Hydroxybenzoic acids	1.35043e+06	1.64965e+06	2.53163e+06	1.09725e+06	542447	706789	776251	583917	418178	275713	195263	238440	298489	301105	422244	303944	317417	358566	3.565	154.026	C7 H6 O4	Gentisic acid
Protocatechuic acid	Phenolic acids	Hydroxybenzoic acids	1.35043e+06	1.64965e+06	2.53163e+06	1.09725e+06	542447	706789	776251	583917	418178	275713	195263	238440	298489	301105	422244	303944	317417	358566	3.565	154.026	C7 H6 O4	Protocatechuic acid
3-Hydroxyphloretin 2'-O-xylosyl-glucoside	Flavonoids	Dihydrochalcones	205228	261614	264562	5953758	5.74117e+06	4634361	7.14509e+06	4097896	6689606	146175	160183	138370	211167	210568	213067	608124	561813	428440	7.25833	584.171	C26 H32 O15	3-Hydroxyphloretin 2'-O-xylosyl-glucoside
6,8-Dihydroxykaempferol	Flavonoids	Flavonols	1	1	1	495959	525548	434841	1	1	1	1	1	1	422581	1	417690	648395	565994	576662	2.17	318.038	C15 H10 O8	6,8-Dihydroxykaempferol
Myricetin	Flavonoids	Flavonols	1	1	1	495959	525548	434841	1	1	1	1	1	1	422581	1	417690	648395	565994	576662	2.17	318.038	C15 H10 O8	Myricetin
Formononetin	Flavonoids	Isoflavonoids	1	269095	1	79851.4	185569	316151	264279	518752	202970	569070	908183	1	275228	221323	210635	118362	126767	157908	5.724	268.072	C16 H12 O4	Formononetin
Daidzein	Flavonoids	Isoflavonoids	3.65656e+06	2.55916e+06	2.64562e+06	94621.2	204366	87390.9	1	1	1	1.01186e+06	1	924685	214305	214040	199243	1	1	1	2.14727	254.063	C15 H10 O4	Daidzein
24-Methylcholestanol ferulate	Phenolic acids	Hydroxycinnamic acids	707519	1	1.16964e+06	329114	316367	304386	1.33006e+06	2239041	2.18736e+06	132131	1	139287	1	1	1	239710	262203	1.74566e+06	20.8938	578.435	C38 H58 O4	24-Methylcholestanol ferulate
3,4-Dicaffeoylquinic acid	Phenolic acids	Hydroxycinnamic acids	205863	156952	108051	1	1	177410	1	1	1	111274	259263	96984.3	679290	715682	656156	1	1	1	1.879	516.128	C25 H24 O12	3,4-Dicaffeoylquinic acid
3,5-Dicaffeoylquinic acid	Phenolic acids	Hydroxycinnamic acids	205863	156952	108051	1	1	177410	1	1	1	111274	259263	96984.3	679290	715682	656156	1	1	1	1.879	516.128	C25 H24 O12	3,5-Dicaffeoylquinic acid
4,5-Dicaffeoylquinic acid	Phenolic acids	Hydroxycinnamic acids	205863	156952	108051	1	1	177410	1	1	1	111274	259263	96984.3	679290	715682	656156	1	1	1	1.879	516.128	C25 H24 O12	4,5-Dicaffeoylquinic acid
(+)-Catechin	Flavonoids	Flavanols	286644	261406	224194	1.94514e+06	1.51842e+06	1.57614e+06	4.03075e+06	3.09673e+06	1873835	521531	288176	624428	152376	234601	202395	185009	155832	147219	10.7617	290.078	C15 H14 O6	(+)-Catechin
(-)-Epicatechin	Flavonoids	Flavanols	286644	261406	224194	1.94514e+06	1.51842e+06	1.57614e+06	4.03075e+06	3.09673e+06	1873835	521531	288176	624428	152376	234601	202395	185009	155832	147219	10.7617	290.078	C15 H14 O6	(-)-Epicatechin
Apigenin 7-O-glucoside	Flavonoids	Flavones	1	152545	134894	174186	179389	150311	386765	406581	386657	1	1	1	528848	580975	576578	111546	369992	330966	7.465	420.143	C21 H24 O9	Apigenin 7-O-glucoside
Delphinidin 3,5-O-diglucoside	Flavonoids	Anthocyanins	1	91420.7	106758	113131	7.779e+06	6.97116e+06	608624	1.06723e+06	623238	1	1	1	356017	103022	340430	568957	544641	573466	4.80143	627.157	C27 H31 O17	Delphinidin 3,5-O-diglucoside
Delphinidin 3-O-glucosyl-glucoside	Flavonoids	Anthocyanins	1	91420.7	106758	113131	7.779e+06	6.97116e+06	608624	1.06723e+06	623238	1	1	1	356017	103022	340430	568957	544641	573466	4.80143	627.157	C27 H31 O17	Delphinidin 3-O-glucosyl-glucoside
p-Coumaroyl tyrosine	Phenolic acids	Hydroxycinnamic acids	2.59165e+06	1	1	261504	269058	281569	1.48839e+06	371062	2.01094e+06	1	1	1	1	1.03865e+06	939407	146236	125891	181230	5.27167	327.108	C18 H17 N O5	p-Coumaroyl tyrosine
Quercetin 3-O-(6''-acetyl-galactoside) 7-O-rhamnoside	Flavonoids	Flavonols	1	1	1	2.32652e+06	3135136	2.75633e+06	157286	179330	349859	1	1	1	796999	781629	832261	1	1	1	5.67333	652.154	C29 H32 O17	Quercetin 3-O-(6''-acetyl-galactoside) 7-O-rhamnoside
Peonidin 3-O-(6''-acetyl-galactoside)	Flavonoids	Anthocyanins	478870	379431	319495	402217	398788	261579	914541	755262	860986	509730	1	348828	1	1	781254	448294	1	307699	6.97286	505.135	C24 H25 O12	Peonidin 3-O-(6''-acetyl-galactoside)
Peonidin 3-O-(6''-acetyl-glucoside)	Flavonoids	Anthocyanins	478870	379431	319495	402217	398788	261579	914541	755262	860986	509730	1	348828	1	1	781254	448294	1	307699	6.97286	505.135	C24 H25 O12	Peonidin 3-O-(6''-acetyl-glucoside)
Oleoside 11-methylester	Other polyphenols	Tyrosols	1	992820	1.25775e+06	1	1	162410	1	185965	1	571550	212731	561326	1	274476	1	253325	272825	228066	8.49182	404.135	C17 H24 O11	Oleoside 11-methylester
2,3-Dihydroxy-1-guaiacylpropanone	Other polyphenols	Hydroxybenzoketones	1.10375e+06	783362	735713	1	385360	378319	1	1	453160	1	1	1	1	344354	611175	763452	646589	1	3.886	212.067	C10 H12 O5	2,3-Dihydroxy-1-guaiacylpropanone
Luteolin 7-O-(2-apiosyl-glucoside)	Flavonoids	Flavones	253481	343032	416971	7.38997e+06	10003062	9727711	3.08172e+06	1	4.9279e+06	1	1	1	222714	232682	217725	538236	508034	486545	5.32214	580.139	C26 H28 O15	Luteolin 7-O-(2-apiosyl-glucoside)
Kaempferol 3-O-xylosyl-glucoside	Flavonoids	Flavonols	253481	343032	416971	7.38997e+06	10003062	9727711	3.08172e+06	1	4.9279e+06	1	1	1	222714	232682	217725	538236	508034	486545	5.32214	580.139	C26 H28 O15	Kaempferol 3-O-xylosyl-glucoside
1,2'-Disinapoyl-2-feruloylgentiobiose	Phenolic acids	Hydroxycinnamic acids	1	1	1	1	1	1	1	1	1	84101	1	1	1	370538	350383	492654	439861	459492	1.5	930.258	C44 H50 O22	1,2'-Disinapoyl-2-feruloylgentiobiose
Petunidin 3-O-galactoside	Flavonoids	Anthocyanins	130960	1	1	103285	139724	146163	283300	1	337778	148276	140976	119786	173000	219740	187636	542634	388198	269970	5.42933	479.117	C22 H23 O12	Petunidin 3-O-galactoside
Petunidin 3-O-glucoside	Flavonoids	Anthocyanins	130960	1	1	103285	139724	146163	283300	1	337778	148276	140976	119786	173000	219740	187636	542634	388198	269970	5.42933	479.117	C22 H23 O12	Petunidin 3-O-glucoside
Pelargonidin 3-O-arabinoside	Flavonoids	Anthocyanins	100018	108089	131378	1	500616	119223	341612	324668	410181	354994	433062	149702	476955	160136	506202	1	1	1	4.50143	403.105	C20 H19 O9	Pelargonidin 3-O-arabinoside
Butein	Flavonoids	Chalcones	963025	1.0462e+06	1.02022e+06	1	1.52673e+06	1.68056e+06	4970066	5371992	4974548	229374	261648	1	197158	1	195401	364793	424188	376383	10.5167	272.066	C15 H12 O5	Butein
Naringenin	Flavonoids	Flavanones	963025	1.0462e+06	1.02022e+06	1	1.52673e+06	1.68056e+06	4970066	5371992	4974548	229374	261648	1	197158	1	195401	364793	424188	376383	10.5167	272.066	C15 H12 O5	Naringenin
7,3',4'-Trihydroxyflavone	Flavonoids	Flavones	2.9813e+06	3.15039e+06	3.16138e+06	1.18903e+06	1220904	1.36006e+06	6083028	6.29381e+06	6.08164e+06	372728	376389	421308	1	280280	141384	194204	94810.4	149342	10.08	270.05	C15 H10 O5	7,3',4'-Trihydroxyflavone
Apigenin	Flavonoids	Flavones	2.9813e+06	3.15039e+06	3.16138e+06	1.18903e+06	1220904	1.36006e+06	6083028	6.29381e+06	6.08164e+06	372728	376389	421308	1	280280	141384	194204	94810.4	149342	10.08	270.05	C15 H10 O5	Apigenin
Baicalein	Flavonoids	Flavones	2.9813e+06	3.15039e+06	3.16138e+06	1.18903e+06	1220904	1.36006e+06	6083028	6.29381e+06	6.08164e+06	372728	376389	421308	1	280280	141384	194204	94810.4	149342	10.08	270.05	C15 H10 O5	Baicalein
Galangin	Flavonoids	Flavonols	2.9813e+06	3.15039e+06	3.16138e+06	1.18903e+06	1220904	1.36006e+06	6083028	6.29381e+06	6.08164e+06	372728	376389	421308	1	280280	141384	194204	94810.4	149342	10.08	270.05	C15 H10 O5	Galangin
Genistein	Flavonoids	Isoflavonoids	2.9813e+06	3.15039e+06	3.16138e+06	1.18903e+06	1220904	1.36006e+06	6083028	6.29381e+06	6.08164e+06	372728	376389	421308	1	280280	141384	194204	94810.4	149342	10.08	270.05	C15 H10 O5	Genistein
Scopoletin	Other polyphenols	Phenolic terpenes	215130	205428	346197	144107	158408	133387	1	1	1	1	275326	1	1	1	1	660804	435651	619854	6.166	192.042	C10 H8 O4	Scopoletin
Cyanidin 3-O-xylosyl-rutinoside	Flavonoids	Anthocyanins	1	1	1	1	1.172e+06	1.03009e+06	176879	671307	879373	701138	706242	448968	1	1	1	1	1	1	8.77625	727.205	C32 H39 O19	Cyanidin 3-O-xylosyl-rutinoside
5-Nonadecylresorcinol	Other polyphenols	Alkylphenols	255589	214736	1	159801	171660	156230	283180	282980	1	326671	240171	194778	1	134579	132214	436050	1	241008	17.965	376.335	C25 H44 O2	5-Nonadecylresorcinol
Arctigenin	Lignans	Lignans	1	1	1	232587	252612	211825	7.40469e+06	8841193	7436658	1	766315	724973	108527	1	95643.5	1	1	1	6.759	372.159	C21 H24 O6	Arctigenin
Quercetin 3-O-(6""-malonyl-glucoside)	Flavonoids	Flavonols	128660	138637	151442	1	1	1	1	1	1	104642	87305.2	86273.2	428858	480554	437046	1	1	1	2.05	550.105	C24 H22 O15	Quercetin 3-O-(6""-malonyl-glucoside)
Carvacrol	Other polyphenols	Phenolic terpenes	3.94056e+06	1	1	907378	935221	758090	1.67315e+06	1	1.71645e+06	1	1	1	1	481240	466014	339474	1	299535	7.044	150.103	C10 H14 O	Carvacrol
Thymol	Other polyphenols	Phenolic terpenes	3.94056e+06	1	1	907378	935221	758090	1.67315e+06	1	1.71645e+06	1	1	1	1	481240	466014	339474	1	299535	7.044	150.103	C10 H14 O	Thymol
Chicoric acid	Phenolic acids	Hydroxycinnamic acids	128778	144983	147160	830421	979019	1.0476e+06	1	118352	119683	1	1	1	270725	282517	281682	227241	228669	276706	13.575	474.075	C22 H18 O12	Chicoric acid
Malvidin 3-O-(6''-p-coumaroyl-glucoside)	Flavonoids	Anthocyanins	1	1	1	1	1	1	1	1	1	1	1	1	118811	102020	131562	412914	490349	256907	4.58	639.189	C32 H31 O14	Malvidin 3-O-(6''-p-coumaroyl-glucoside)
Isorhamnetin 3-O-glucuronide	Flavonoids	Flavonols	198510	103294	112337	1	1	1	916764	907162	1.11389e+06	1	1	1	281790	304408	294147	1	307147	318311	2.01	492.099	C22 H20 O13	Isorhamnetin 3-O-glucuronide
Caffeoyl tartaric acid	Phenolic acids	Hydroxycinnamic acids	1050417	770916	707158	1	1	1	272503	154401	356617	244744	198096	487481	148608	168601	181326	1	1	1	5.9425	312.053	C13 H12 O9	Caffeoyl tartaric acid
Delphinidin 3-O-sambubioside	Flavonoids	Anthocyanins	1	1	1	155243	194514	196132	96037.8	1	174643	536676	443612	1	1	1	1	112444	105720	129539	9.98	597.145	C26 H29 O16	Delphinidin 3-O-sambubioside
Kaempferol 7-O-glucoside	Flavonoids	Flavonols	724537	599082	772506	1	173417	193598	1	1	1	202148	1	193021	123600	128991	124634	189907	202719	148868	7.98538	447.094	C21 H19 O11	Kaempferol 7-O-glucoside
Jaceidin 4'-O-glucuronide	Flavonoids	Flavonols	231611	135811	1	177982	1	252888	1	1	1	99688.6	113295	89679.6	337807	334350	309198	1	1	1	5.74	536.128	C24 H24 O14	Jaceidin 4'-O-glucuronide
Caffeic acid 4-O-glucoside	Phenolic acids	Hydroxycinnamic acids	495938	413049	479405	886851	1.35491e+06	1.1598e+06	1.48479e+06	1.51864e+06	16787396	160048	202912	381697	155416	122093	102699	1	1	147727	4.43125	342.094	C15 H18 O9	Caffeic acid 4-O-glucoside
Caffeoyl glucose	Phenolic acids	Hydroxycinnamic acids	495938	413049	479405	886851	1.35491e+06	1.1598e+06	1.48479e+06	1.51864e+06	16787396	160048	202912	381697	155416	122093	102699	1	1	147727	4.43125	342.094	C15 H18 O9	Caffeoyl glucose
Cyanidin 3-O-(6''-malonyl-glucoside)	Flavonoids	Anthocyanins	287736	172286	120890	337579	304501	218719	101795	1	110384	1	1	1	409332	435859	400409	1	1	1	4.76909	535.118	C24 H23 O14	Cyanidin 3-O-(6''-malonyl-glucoside)
Kaempferol 3,7,4'-O-triglucoside	Flavonoids	Flavonols	1	1	1	371834	249282	311673	1	1	1	1	1	1	447438	337259	455898	1	1	1	4.895	772.218	C33 H40 O21	Kaempferol 3,7,4'-O-triglucoside
Kaempferol 3-O-sophoroside 7-O-glucoside	Flavonoids	Flavonols	1	1	1	371834	249282	311673	1	1	1	1	1	1	447438	337259	455898	1	1	1	4.895	772.218	C33 H40 O21	Kaempferol 3-O-sophoroside 7-O-glucoside
Quercetin 3-O-glucosyl-rhamnosyl-galactoside	Flavonoids	Flavonols	1	1	1	371834	249282	311673	1	1	1	1	1	1	447438	337259	455898	1	1	1	4.895	772.218	C33 H40 O21	Quercetin 3-O-glucosyl-rhamnosyl-galactoside
Quercetin 3-O-glucosyl-rhamnosyl-glucoside	Flavonoids	Flavonols	1	1	1	371834	249282	311673	1	1	1	1	1	1	447438	337259	455898	1	1	1	4.895	772.218	C33 H40 O21	Quercetin 3-O-glucosyl-rhamnosyl-glucoside
Cyanidin 3-O-(6''-malonyl-3''-glucosyl-glucoside)	Flavonoids	Anthocyanins	1	1	1	96331.9	93090.1	1	1	1	1	1	1	1	170311	182634	179147	206304	226256	223724	7.63	697.167	C30 H33 O19	Cyanidin 3-O-(6''-malonyl-3''-glucosyl-glucoside)
Kaempferol 3-O-acetyl-glucoside	Flavonoids	Flavonols	191066	140859	1	443392	389337	323905	1	1	1	151270	202108	1	1	339989	1	142824	133874	134844	5.45727	490.116	C23 H22 O12	Kaempferol 3-O-acetyl-glucoside
Quercetin 3-O-acetyl-rhamnoside	Flavonoids	Flavonols	191066	140859	1	443392	389337	323905	1	1	1	151270	202108	1	1	339989	1	142824	133874	134844	5.45727	490.116	C23 H22 O12	Quercetin 3-O-acetyl-rhamnoside
6''-O-Acetyldaidzin	Flavonoids	Isoflavonoids	574143	384915	288186	1	893464	788841	524793	1	456297	124469	297620	396468	1	1	1	92059.9	108865	1	4.4	458.116	C23 H22 O10	6''-O-Acetyldaidzin
Luteolin 7-O-malonyl-glucoside	Flavonoids	Flavones	150968	1	1	337579	304501	218719	101795	1	110384	1	1	1	399827	548022	1	1	1	1	5.94625	534.097	C24 H22 O14	Luteolin 7-O-malonyl-glucoside
5,4'-Dihydroxy-3,3'-dimethoxy-6:7-methylenedioxyflavone 4'-O-glucuronide	Flavonoids	Flavonols	150968	1	1	337579	304501	218719	101795	1	110384	1	1	1	399827	548022	1	1	1	1	5.94625	534.097	C24 H22 O14	5,4'-Dihydroxy-3,3'-dimethoxy-6:7-methylenedioxyflavone 4'-O-glucuronide
Kaempferol 3-O-(6""-malonyl-glucoside)	Flavonoids	Flavonols	150968	1	1	337579	304501	218719	101795	1	110384	1	1	1	399827	548022	1	1	1	1	5.94625	534.097	C24 H22 O14	Kaempferol 3-O-(6""-malonyl-glucoside)
1,2-Diferuloylgentiobiose	Phenolic acids	Hydroxycinnamic acids	1	1	1	594491	1.21878e+06	1.31456e+06	277785	1	571116	188327	1	112989	1	1	1	232065	223636	188881	6.58	694.214	C32 H38 O17	1,2-Diferuloylgentiobiose
6''-O-Acetylgenistin	Flavonoids	Isoflavonoids	822570	956606	1.17956e+06	1.23205e+06	1.15654e+06	1	692838	627672	659048	205349	159240	138303	1	1	1	122899	116709	117969	7.84071	474.113	C23 H22 O11	6''-O-Acetylgenistin
Quercetin 3-O-arabinoside	Flavonoids	Flavonols	1	1	1	1	1	1	1	1	1	1	1	1	127787	131661	148381	160857	145679	140157	14.32	434.087	C20 H18 O11	Quercetin 3-O-arabinoside
Quercetin 3-O-xyloside	Flavonoids	Flavonols	1	1	1	1	1	1	1	1	1	1	1	1	127787	131661	148381	160857	145679	140157	14.32	434.087	C20 H18 O11	Quercetin 3-O-xyloside
Apigenin 7-O-glucuronide	Flavonoids	Flavones	157809	122699	1	1	161428	174895	1	1	1	238629	1	218780	1	1	1	189907	202719	1	6.125	446.088	C21 H18 O11	Apigenin 7-O-glucuronide
Malvidin 3-O-glucoside	Flavonoids	Anthocyanins	119062	111757	89251.8	1	1	1	102232	91128.6	138034	262341	270507	198563	1	1	1	1	1	1	2.15	493.141	C23 H25 O12	Malvidin 3-O-glucoside
Cyanidin 3-O-(6''-acetyl-galactoside)	Flavonoids	Anthocyanins	1	1	1	329527	290782	259024	1	1	1	137925	148161	134687	1	277279	1	1	1	1	4.71429	491.125	C23 H23 O12	Cyanidin 3-O-(6''-acetyl-galactoside)
Cyanidin 3-O-(6''-acetyl-glucoside)	Flavonoids	Anthocyanins	1	1	1	329527	290782	259024	1	1	1	137925	148161	134687	1	277279	1	1	1	1	4.71429	491.125	C23 H23 O12	Cyanidin 3-O-(6''-acetyl-glucoside)
1,2,2'-Triferuloylgentiobiose	Phenolic acids	Hydroxycinnamic acids	1	1	1	1	1	1	1	1	1	1	1	1	1	1	1	267191	215315	209959	1.5	870.248	C42 H46 O20	1,2,2'-Triferuloylgentiobiose
Quercetin 3-O-(6""-malonyl-glucoside) 7-O-glucoside	Flavonoids	Flavonols	1	1	1	102207	215895	98429	1	1	1	1	1	1	228785	200392	217964	1	1	1	3.325	712.155	C30 H32 O20	Quercetin 3-O-(6""-malonyl-glucoside) 7-O-glucoside
Ellagic acid acetyl-arabinoside	Phenolic acids	Hydroxybenzoic acids	1	269535	393278	1	1	1	1	1	1	207187	1	436322	1	1	1	1	1	1	4.325	476.073	C21 H16 O13	Ellagic acid acetyl-arabinoside
Ellagic acid acetyl-xyloside	Phenolic acids	Hydroxybenzoic acids	1	269535	393278	1	1	1	1	1	1	207187	1	436322	1	1	1	1	1	1	4.325	476.073	C21 H16 O13	Ellagic acid acetyl-xyloside
Phloretin 2'-O-xylosyl-glucoside	Flavonoids	Dihydrochalcones	254062	195536	152205	1.98468e+06	1887433	2.55001e+06	472035	333297	444373	281023	1	229915	1	1	1	1	1	1	4.99	568.173	C26 H32 O14	Phloretin 2'-O-xylosyl-glucoside
Malvidin 3-O-galactoside	Flavonoids	Anthocyanins	192129	162414	171960	1	1	1	1	1	1	190981	315174	1	1	1	1	1	1	1	3.49	528.115	C23 H25 Cl O12	Malvidin 3-O-galactoside
Bergapten	Other polyphenols	Furanocoumarins	1091704	300547	719866	179665	198524	133140	1	1	1	1	1	1	134517	134733	137738	92914.6	1	1	5.147	216.044	C12 H8 O4	Bergapten
Xanthotoxin	Other polyphenols	Furanocoumarins	1091704	300547	719866	179665	198524	133140	1	1	1	1	1	1	134517	134733	137738	92914.6	1	1	5.147	216.044	C12 H8 O4	Xanthotoxin
Delphinidin 3-O-arabinoside	Flavonoids	Anthocyanins	256423	204627	190648	1	1	1	1	1	1	171527	159960	163551	1	1	1	1	1	1	2.05	435.089	C20 H19 O11	Delphinidin 3-O-arabinoside
Delphinidin 3-O-xyloside	Flavonoids	Anthocyanins	256423	204627	190648	1	1	1	1	1	1	171527	159960	163551	1	1	1	1	1	1	2.05	435.089	C20 H19 O11	Delphinidin 3-O-xyloside
Coumestrol	Other polyphenols	Other polyphenols	1.78653e+06	1	1	1	1	1	409698	393146	311017	164649	175533	146580	1	1	1	1	1	1	2.23143	268.031	C15 H8 O5	Coumestrol
Gallic acid 3-O-gallate	Phenolic acids	Hydroxybenzoic acids	549016	587629	534730	133931	159612	140856	1	1	103813	171570	97524	185605	1	1	1	1	1	1	4.096	322.035	C14 H10 O9	Gallic acid 3-O-gallate
Malvidin 3-O-(6''-caffeoyl-glucoside)	Flavonoids	Anthocyanins	1	1	1	381133	206889	394864	1	1	1	157484	140067	147030	1	1	1	1	1	1	3.62	655.158	C32 H31 O15	Malvidin 3-O-(6''-caffeoyl-glucoside)
Quercetin 3-O-xylosyl-glucuronide	Flavonoids	Flavonols	1	1	1	1	305557	144860	1	1	103654	237202	195524	1	1	1	1	1	1	1	8.422	610.126	C26 H26 O17	Quercetin 3-O-xylosyl-glucuronide
Juglone	Other polyphenols	Naphtoquinones	194909	162308	291976	1	1	1	1	1	1	1	1	1	170107	163839	1	1	1	1	7.458	174.034	C10 H6 O3	Juglone
Malvidin 3,5-O-diglucoside	Flavonoids	Anthocyanins	1	1	1	1	1	1	1	1	1	162480	1	158044	1	1	1	1	1	1	3.72	655.176	C29 H35 O17	Malvidin 3,5-O-diglucoside
Kaempferol 3-O-rhamnoside	Flavonoids	Flavonols	379306	1	254549	1.4907e+06	801681	776932	3151122	1.96333e+06	1.10264e+06	1	81721.1	134715	1	1	1	1	1	1	5.502	431.095	C21 H19 O10	Kaempferol 3-O-rhamnoside
Pelargonidin 3-O-(6''-malonyl-glucoside)	Flavonoids	Anthocyanins	235410	254940	293703	7657390	7267121	7184847	2.35702e+06	1.76281e+06	2.14724e+06	1	1	1	1	1	1	1	1	1	7.67	519.109	C24 H23 O13	Pelargonidin 3-O-(6''-malonyl-glucoside)
6''-O-Malonylgenistin	Flavonoids	Isoflavonoids	212647	254940	293703	7.35958e+06	6970542	6.89801e+06	2.27287e+06	1.60915e+06	2.06313e+06	1	1	1	1	1	1	1	1	1	7.67	518.101	C24 H22 O13	6''-O-Malonylgenistin
Apigenin 7-O-(6''-malonyl-apiosyl-glucoside)	Flavonoids	Flavones	367258	516816	592306	7568407	632062	701931	820499	877652	1.63628e+06	1	1	1	1	1	1	1	1	1	6.96667	650.14	C29 H30 O17	Apigenin 7-O-(6''-malonyl-apiosyl-glucoside)
Chrysoeriol 7-O-(6''-malonyl-apiosyl-glucoside)	Flavonoids	Flavones	143798	187437	206129	1980583	2.88461e+06	4.10544e+06	549937	1	539793	1	1	1	1	1	1	1	1	1	7.17	680.152	C30 H32 O18	Chrysoeriol 7-O-(6''-malonyl-apiosyl-glucoside)
Naringin 6'-malonate	Flavonoids	Flavanones	594430	759552	832558	1.62979e+06	2.23758e+06	2.58937e+06	163669	87494.4	142462	1	1	1	1	1	1	1	1	1	8.18667	666.173	C30 H34 O17	Naringin 6'-malonate
Pelargonidin 3,5-O-diglucoside	Flavonoids	Anthocyanins	108536	1	1	652478	720082	670381	1	1	110565	1	1	1	1	1	1	1	1	1	6.83	630.151	C27 H31 Cl O15	Pelargonidin 3,5-O-diglucoside
Luteolin 7-O-(2-apiosyl-6-malonyl)-glucoside	Flavonoids	Flavones	241500	203792	210593	248221	370752	351824	1	1	1	1	1	1	1	1	1	1	1	1	7.715	666.138	C29 H30 O18	Luteolin 7-O-(2-apiosyl-6-malonyl)-glucoside
Cyanidin 3-O-sambubioside	Flavonoids	Anthocyanins	153281	148588	182006	199153	259815	239182	1	133025	1	1	1	1	1	1	1	1	1	1	5.70143	616.13	C26 H29 Cl O15	Cyanidin 3-O-sambubioside
Myricetin 3-O-galactoside	Flavonoids	Flavonols	197261	120469	1	242905	234309	201710	1	1	164421	1	1	1	1	1	1	1	1	1	5.4	480.099	C21 H20 O13	Myricetin 3-O-galactoside
Myricetin 3-O-glucoside	Flavonoids	Flavonols	197261	120469	1	242905	234309	201710	1	1	164421	1	1	1	1	1	1	1	1	1	5.4	480.099	C21 H20 O13	Myricetin 3-O-glucoside
Cyanidin 3-O-(6''-succinyl-glucoside)	Flavonoids	Anthocyanins	114384	121818	121895	1	1	1	296030	227447	244802	1	1	1	1	1	1	1	1	1	4.725	549.123	C25 H25 O14	Cyanidin 3-O-(6''-succinyl-glucoside)
Chrysoeriol 7-O-(6''-malonyl-glucoside)	Flavonoids	Flavones	1	1	1	1	1	1	228679	178525	215307	1	1	1	1	1	1	1	1	1	7.42	548.115	C25 H24 O14	Chrysoeriol 7-O-(6''-malonyl-glucoside)
Theaflavin 3'-O-gallate	Flavonoids	Flavanols	126202	169328	171325	1	1	1	1	1	1	1	1	1	1	1	1	1	1	1	8.54	716.149	C36 H28 O16	Theaflavin 3'-O-gallate
Theaflavin 3-O-gallate	Flavonoids	Flavanols	126202	169328	171325	1	1	1	1	1	1	1	1	1	1	1	1	1	1	1	8.54	716.149	C36 H28 O16	Theaflavin 3-O-gallate
Quercetin 3-O-xylosyl-rutinoside	Flavonoids	Flavonols	1	1	1	1	1	1	135934	243737	1	1	1	1	1	1	1	1	1	1	5.05	742.214	C32 H38 O20	Quercetin 3-O-xylosyl-rutinoside
6''-O-Malonylglycitin	Flavonoids	Isoflavonoids	151766	114315	1	1	1	1	1	1	1	1	1	1	1	1	1	1	1	1	1.6	532.122	C25 H24 O13	6''-O-Malonylglycitin
