# Supplementary material for: Untargeted Phenolic Profiling and Functional Insights of the Aerial Parts and Bulbs of Drimia maritima (L.) Stearn
Source: Plants (Basel). 2022 Feb 23;11(5):600. doi: 10.3390/plants11050600 (PMC8912325; doi:10.3390/plants11050600)
Supplement: Supplementary file 1 [file plants-11-00600-s001.zip › Table S5 - Pearson's correlation.xlsx]

## Sheet: Pearson's Corr
	matrix of p value
	Anthocyanins	Flavanols	Flavonols	Other.Flavonoids	Lignans	Other.polyphenols	Phenolic.acids	Stilbenes	TPC	TFC	DPPH	ABTS	CUPRAC	FRAP	Metal_chelating	PMD	AChE	BChE	Tyrosinase	Amylase	Glucosidase																											A_EA	A_EA.1
Anthocyanins	0	0.00632186	0.000259379	0.00247699	0.000493259	0.0177077	0.028289	0.579958	0.000887161	0.00494373	3.94081e-05	0.000143422	0.00939434	0.000209658	0.000304347	0.000318888	0.732085	0.00721562	0.724861	0.402894	0.210137																										A_EA	0	0.646027
Flavanols	0.00632186	0	0.240138	0.05608	0.0846004	0.00564174	0.828964	0.296536	0.000393054	0.880512	1.26836e-07	2.2092e-07	0.00185709	6.45456e-08	0.0382477	0.00330408	0.015676	1.12931e-05	0.00407529	0.0113199	0.18363																										A_EA.1	0.646027	0
Flavonols	0.000259379	0.240138	0	0.000410815	0.311109	0.38543	0.000161727	0.330362	0.208202	0.165511	0.00856458	0.0268425	0.206904	0.0238312	0.230387	0.00393483	0.338467	0.0518469	0.889734	0.117764	0.00282134																										A_EA.2	0.533294	0.0625618
Other.Flavonoids	0.00247699	0.05608	0.000410815	0	0.232595	0.706489	0.218836	0.288586	0.00132911	0.447919	0.000452935	0.000529184	9.37315e-05	0.000449224	0.356134	0.239891	0.287201	0.138315	0.844683	0.508833	0.305569																										A_MeOH	0.0247292	-0.0354804
Lignans	0.000493259	0.0846004	0.311109	0.232595	0	0.105677	0.700784	0.00400068	0.000564011	9.70252e-05	0.0203927	0.0105655	0.0154594	0.0228348	0.000432067	0.0682272	0.0569861	0.509105	0.204041	0.165679	0.37478																										A_MOH.1	0.0368472	-0.0770081
Other.polyphenols	0.0177077	0.00564174	0.38543	0.706489	0.105677	0	0.0831135	0.666521	0.30871	0.224855	0.045815	0.0959582	0.911084	0.0866947	0.00046476	0.000448094	0.14467	9.15981e-05	0.0114371	0.0215631	0.161082																										A_MOH.2	0	0
Phenolic.acids	0.028289	0.828964	0.000161727	0.218836	0.700784	0.0831135	0	0.857412	0.87193	0.0984754	0.310851	0.575411	0.602179	0.553146	0.107994	0.0110211	0.359086	0.0836248	0.63251	0.104215	0.00469206																										A_H2O	-0.0185858	0.0598492
Stilbenes	0.579958	0.296536	0.330362	0.288587	0.00400068	0.666521	0.857412	0	0.478104	0.000145216	0.395373	0.518805	0.972441	0.388244	0.0280896	0.50146	0.000143197	0.134574	0.0134643	0.000375955	0.00373935																										A_H2O.1	-0.0315816	0.0369923
TPC	0.000887161	0.000393054	0.208202	0.00132911	0.000564011	0.30871	0.87193	0.478104	0	0.110993	1.09873e-05	6.527e-07	2.45609e-10	2.2845e-06	0.0069605	0.185826	0.788118	0.0620633	0.66044	0.915471	0.545957																										A_H2O.2	-0.0864375	0.106453
TFC	0.00494373	0.880512	0.165511	0.447919	9.70252e-05	0.224855	0.0984754	0.000145216	0.110993	0	0.503052	0.510931	0.400684	0.632889	0.000186712	0.346477	0.0169479	0.956223	0.0563039	0.0464509	0.257586																										R_EA	0	0.0332414
DPPH	3.94081e-05	1.26836e-07	0.00856458	0.000452935	0.0203927	0.045815	0.310851	0.395373	1.09873e-05	0.503052	0	7.2434e-15	5.27088e-05	1.91774e-16	0.0270337	0.00131166	0.0800661	0.000225245	0.0974382	0.0535781	0.112875																										R_EA.1	0.110089	0
ABTS	0.000143422	2.2092e-07	0.0268425	0.000529184	0.0105655	0.0959582	0.575411	0.518805	6.527e-07	0.510931	7.2434e-15	0	3.91518e-06	7.11689e-19	0.0382303	0.00509963	0.159965	0.00163322	0.175692	0.137129	0.24986																										R_EA.2	0.0027448	0.00816193
CUPRAC	0.00939434	0.00185709	0.206904	9.37315e-05	0.0154594	0.911084	0.602179	0.972441	2.45609e-10	0.400684	5.27088e-05	3.91518e-06	0	7.22998e-06	0.100984	0.463372	0.613164	0.143725	0.710855	0.925797	0.575622																										R_MeOH	0.00825944	0
FRAP	0.000209658	6.45456e-08	0.0238312	0.000449224	0.0228348	0.0866947	0.553146	0.388244	2.2845e-06	0.632889	1.91774e-16	7.11689e-19	7.22998e-06	0	0.0461193	0.00492838	0.0908654	0.000673615	0.107696	0.0822732	0.196297																										R_MOH.1	0	0
Metal_chelating	0.000304347	0.0382477	0.230387	0.356134	0.000432067	0.00046476	0.107994	0.0280896	0.0069605	0.000186712	0.0270337	0.0382303	0.100984	0.0461193	0	0.0427898	0.976789	0.0194811	0.46144	0.937512	0.66789																										R_MOH.2	0	0
PMD	0.000318888	0.00330408	0.00393483	0.239892	0.0682272	0.000448094	0.0110211	0.50146	0.185826	0.346477	0.00131166	0.00509963	0.463372	0.00492838	0.0427898	0	0.184777	0.000460933	0.160552	0.0076467	0.000856811																										R_H2O	0	0
AChE	0.732085	0.015676	0.338467	0.287201	0.0569861	0.14467	0.359086	0.000143197	0.788118	0.0169479	0.0800661	0.159965	0.613164	0.0908654	0.976789	0.184777	0	0.000191856	2.39335e-08	1.92744e-07	0.0127653																										R_H2O.1	0	-0.0886512
BChE	0.00721562	1.12931e-05	0.0518469	0.138315	0.509105	9.15981e-05	0.0836248	0.134574	0.0620633	0.956223	0.000225245	0.00163322	0.143725	0.000673615	0.0194811	0.000460933	0.000191856	0	2.64352e-05	3.50991e-05	0.01891																										R_H2O.2	0	-0.00883176
Tyrosinase	0.724861	0.00407529	0.889734	0.844683	0.204041	0.0114371	0.632511	0.0134643	0.66044	0.0563039	0.0974382	0.175692	0.710855	0.107696	0.46144	0.160552	2.39335e-08	2.64352e-05	0	4.78607e-06	0.0843901
Amylase	0.402894	0.0113199	0.117764	0.508833	0.165679	0.0215631	0.104215	0.000375955	0.915471	0.0464509	0.0535781	0.137129	0.925797	0.0822732	0.937512	0.0076467	1.92744e-07	3.50991e-05	4.78607e-06	0	3.57757e-05
Glucosidase	0.210137	0.18363	0.00282134	0.305569	0.37478	0.161082	0.00469207	0.00373935	0.545957	0.257586	0.112875	0.24986	0.575622	0.196297	0.66789	0.000856811	0.0127653	0.01891	0.0843901	3.57757e-05	0
	matrix of correlation
	Anthocyanins	Flavanols	Flavonols	Other.Flavonoids	Lignans	Other.polyphenols	Phenolic.acids	Stilbenes	TPC	TFC	DPPH	ABTS	CUPRAC	FRAP	Metal_chelating	PMD	AChE	BChE	Tyrosinase	Amylase	Glucosidase
Anthocyanins	1	0.617517	0.759063	0.66741	-0.736322	-0.551329	-0.516237	-0.139844	0.713386	0.631453	0.814029	0.778081	0.59365	0.766097	0.753622	-0.752007	-0.0867705	-0.609751	-0.0891981	-0.210021	-0.310298
Flavanols	0.617517	1	0.291735	0.457801	-0.417655	-0.624048	-0.054816	0.260467	0.744625	-0.0381574	0.912859	0.906354	0.681137	0.920149	0.491634	-0.652963	-0.559897	-0.84283	-0.641963	-0.58176	-0.3282
Flavonols	0.759063	0.291735	1	0.743032	-0.252992	-0.217735	-0.774366	0.243429	0.311553	0.341456	0.599387	0.520349	0.312399	0.529498	0.297596	-0.643831	-0.239501	-0.464998	-0.0351946	-0.381972	-0.660975
Other.Flavonoids	0.66741	0.457801	0.743032	1	-0.296255	0.0954062	-0.304749	0.264638	0.696241	0.190923	0.739476	0.73369	0.790701	0.739778	0.231123	-0.291882	-0.265372	-0.363349	-0.0497167	-0.166583	-0.255808
Lignans	-0.736322	-0.417655	-0.252992	-0.296255	1	0.394025	0.0973444	0.642949	-0.731277	-0.789707	-0.541125	-0.586209	-0.560861	-0.532724	-0.741202	0.43919	-0.456314	0.166478	-0.314277	-0.341328	-0.222534
Other.polyphenols	-0.551329	-0.624048	-0.217735	0.0954062	0.394025	1	0.419477	0.109099	-0.254208	-0.300992	-0.476062	-0.404452	-0.0283515	-0.415127	-0.738528	0.73987	0.357984	0.791361	0.581089	0.537005	0.344844
Phenolic.acids	-0.516237	-0.054816	-0.774366	-0.304749	0.0973444	0.419477	1	-0.0456004	0.0409189	-0.401681	-0.253122	-0.141509	0.131788	-0.149742	-0.39164	0.583492	0.229747	0.418848	0.120982	0.395547	0.634332
Stilbenes	-0.139844	0.260467	0.243429	0.264638	0.642949	0.109099	-0.0456004	1	-0.178671	-0.7777	0.21332	0.162736	-0.00877247	0.216479	-0.516794	-0.169451	-0.778129	-0.366587	-0.570291	-0.746216	-0.646525
TPC	0.713386	0.744625	0.311553	0.696241	-0.731277	-0.254208	0.0409189	-0.178671	1	0.388609	0.843406	0.892155	0.960846	0.872875	0.611884	-0.326655	-0.0681664	-0.448294	-0.111207	0.0269477	0.152431
TFC	0.631453	-0.0381574	0.341456	0.190923	-0.789707	-0.300992	-0.401681	-0.7777	0.388609	1	0.16883	0.165771	0.210987	0.120848	0.76983	-0.235672	0.554437	0.0139389	0.457432	0.474846	0.281614
DPPH	0.814029	0.912859	0.599387	0.739476	-0.541125	-0.476062	-0.253122	0.21332	0.843406	0.16883	1	0.98949	0.806534	0.993335	0.519796	-0.69682	-0.423287	-0.763753	-0.402816	-0.462003	-0.386736
ABTS	0.778081	0.906354	0.520349	0.73369	-0.586209	-0.404452	-0.141509	0.162736	0.892155	0.165771	0.98949	1	0.863495	0.996693	0.491673	-0.629729	-0.345708	-0.68704	-0.333894	-0.364369	-0.286041
CUPRAC	0.59365	0.681137	0.312399	0.790701	-0.560861	-0.0283515	0.131788	-0.00877247	0.960846	0.210987	0.806534	0.863495	1	0.85191	0.398969	-0.184601	-0.12785	-0.358772	-0.0939261	0.0236465	0.141431
FRAP	0.766097	0.920149	0.529498	0.739778	-0.532724	-0.415127	-0.149742	0.216479	0.872875	0.120848	0.993335	0.996693	0.85191	1	0.475479	-0.631625	-0.410223	-0.724421	-0.391945	-0.420517	-0.319447
Metal_chelating	0.753622	0.491634	0.297596	0.231123	-0.741202	-0.738528	-0.39164	-0.516794	0.611884	0.76983	0.519796	0.491673	0.398969	0.475479	1	-0.482033	0.00738801	-0.544464	-0.185385	-0.0199059	0.108625
PMD	-0.752007	-0.652963	-0.643831	-0.291882	0.43919	0.73987	0.583493	-0.169451	-0.326655	-0.235672	-0.69682	-0.629729	-0.1846	-0.631625	-0.482033	1	0.327391	0.738832	0.345253	0.60628	0.714809
AChE	-0.0867705	-0.559897	-0.239501	-0.265372	-0.456314	0.357984	0.229747	-0.778129	-0.0681664	0.554437	-0.423287	-0.345708	-0.12785	-0.410223	0.00738801	0.327392	1	0.768961	0.929733	0.907999	0.573858
BChE	-0.609751	-0.84283	-0.464998	-0.363349	0.166478	0.791361	0.418848	-0.366587	-0.448294	0.0139389	-0.763753	-0.68704	-0.358772	-0.724421	-0.544464	0.738832	0.768961	1	0.823807	0.816924	0.546619
Tyrosinase	-0.0891981	-0.641963	-0.0351946	-0.0497167	-0.314277	0.581089	0.120982	-0.570291	-0.111207	0.457432	-0.402816	-0.333894	-0.0939261	-0.391945	-0.185385	0.345253	0.929733	0.823807	1	0.859811	0.417911
Amylase	-0.210021	-0.58176	-0.381972	-0.166583	-0.341328	0.537005	0.395547	-0.746216	0.0269477	0.474846	-0.462003	-0.364369	0.0236465	-0.420517	-0.0199059	0.60628	0.907999	0.816924	0.859811	1	0.81645
Glucosidase	-0.310298	-0.3282	-0.660975	-0.255808	-0.222534	0.344844	0.634332	-0.646525	0.152432	0.281614	-0.386736	-0.286041	0.141431	-0.319447	0.108625	0.714809	0.573858	0.546619	0.417911	0.81645	1
[truncated: 16 more columns]
